1 **Genome-wide association study in the pseudocereal quinoa**  
2 **reveals selection pattern typical for crops with a short**  
3 **breeding history**

4 Dilan S. R. Patiranage<sup>1</sup>, Elodie Rey<sup>2</sup>, Nazgol Emrani<sup>1,\*</sup>, Gordon Wellman<sup>2</sup>, Karl Schmid<sup>3</sup>, Sandra  
5 M. Schmöckel<sup>4</sup>, Mark Tester<sup>2</sup> and Christian Jung<sup>1,\*</sup>

6 <sup>1</sup>Plant Breeding Institute, Christian-Albrechts-University of Kiel, Am Botanischen Garten 1-9,  
7 24118 Kiel, Germany

8 <sup>2</sup>King Abdullah University of Science and Technology (KAUST), Biological and Environmental  
9 Sciences & Engineering Division (BESE), Thuwal, 23955-6900, Saudi Arabia.

10 <sup>3</sup>Institute of Plant Breeding, Seed Science and Population Genetics, University of Hohenheim,  
11 Fruwirthstr. 21, 70599 Stuttgart, Germany.

12 <sup>4</sup>Department of Physiology of Yield Stability, University of Hohenheim, Fruwirthstr. 21, 70599

13

14 \*Corresponding authors email: [c.jung@plantbreeding.uni-kiel.de](mailto:c.jung@plantbreeding.uni-kiel.de)

15 \*Corresponding authors email: [n.emrani@plantbreeding.uni-kiel.de](mailto:n.emrani@plantbreeding.uni-kiel.de)

16 Correspondence to: Dr. Nazgol Emrani  
17 Plant Breeding Institute  
18 Christian-Albrechts-University of Kiel  
19 Olshausenstrasse 40  
20 D-24118 Kiel  
21 Germany  
22 Tel.: +49-4318807364  
23 Fax: +49-4318802566

24 Email: [n.emrani@plantbreeding.uni-kiel.de](mailto:n.emrani@plantbreeding.uni-kiel.de)

25 Correspondence to: Prof. Dr. Christian Jung  
26 Plant Breeding Institute  
27 Christian-Albrechts-University of Kiel  
28 Olshausenstrasse 40  
29 D-24118 Kiel  
30 Germany  
31 Tel.: +49-4318807364  
32 Fax: +49-4318802566

33 Email: [c.jung@plantbreeding.uni-kiel.de](mailto:c.jung@plantbreeding.uni-kiel.de)

34

35

36 **Keywords:** *Chenopodium quinoa*, plant breeding, population structure, re-sequencing, adaptation,  
37 domestication, genetic variation

## 38 Abstract

39 Quinoa germplasm preserves useful and substantial genetic variation, yet it remains untapped due to  
40 a lack of implementation of modern breeding tools. We have integrated field and sequence data to  
41 characterize a large diversity panel of quinoa. Whole-genome sequencing of 310 accessions  
42 revealed 2.9 million polymorphic high confidence SNP loci. Highland and Lowland quinoa were  
43 clustered into two main groups, with  $F_{ST}$  divergence of 0.36 and fast LD decay of 6.5 and 49.8 Kb,  
44 respectively. A genome-wide association study uncovered 600 SNPs stably associated with 17  
45 agronomic traits. Two candidate genes are associated with thousand seed weight, and a resistance  
46 gene analog is associated with downy mildew resistance. We also identified pleiotropically acting  
47 loci for four agronomic traits that are highly responding to photoperiod hence important for the  
48 adaptation to different environments. This work demonstrates the use of re-sequencing data of an  
49 orphan crop, which is partially domesticated to rapidly identify marker-trait association and  
50 provides the underpinning elements for genomics-enabled quinoa breeding.

## 51 Introduction

52 Climate change poses a great threat to crop production worldwide. In temperate climates of the  
53 world, higher temperatures and extended drought periods are expected. Moreover, crop production  
54 in industrialized countries depends on only a few major crops resulting in narrow crop rotations.  
55 Therefore, rapid transfer of wild species into crops using genetic modification and targeted  
56 mutagenesis is currently discussed<sup>1,2</sup>. Alternatively, orphan crops with a long tradition of  
57 cultivation but low breeding intensity can be genetically improved by genomics assisted selection  
58 methods. Quinoa (*Chenopodium quinoa* Willd.) is a pseudocereal crop species with a long history  
59 of cultivation. It was first domesticated about 5000-7000 years ago in the Andean region. Quinoa  
60 was a staple food during the pre-Columbian era, and the cultivation declined after the introduction  
61 of crops like wheat and barley by the Spanish rulers. Owing to diversity, biotic and abiotic stress  
62 tolerance, and ecological plasticity, quinoa can adapt to a broad range of agroecological regions<sup>3,4</sup>.  
63 Due to a high seed protein content and a favorable amino acid composition, its biological value is  
64 even higher than beef, fish, and other major cereals<sup>5,6</sup>. These favorable characteristics contributed  
65 to the increasing worldwide popularity of quinoa among consumers and farmers.

66 A spontaneous hybridization event between two diploid species between 3.3 and 6.3 million years  
67 ago gave rise to the allotetraploid species quinoa ( $2n = 4x = 36$ ) with a genome size of 1.45-1.5 Gb  
68 (nuclear DNA content  $1C = 1.49$  pg)<sup>7,8</sup>. A reference genome of the coastal Chilean quinoa  
69 accession PI 614886 has been published with 44,776 predicted gene models together with whole-  
70 genome re-sequencing of *C. pallidicaule* and *C. suecicum* species, close relatives of the A and B  
71 subgenome donor species, respectively<sup>9</sup>. The organellar genomes are originated from the A-  
72 genome ancestor<sup>10</sup>.

73 Quinoa belongs to the Amaranthaceae, together with some other economically important crops like  
74 sugar beet, red beet, spinach, and amaranth. It reproduces sexually after self-pollination. Facultative  
75 autogamy was reported for plants in close proximity with outcrossing rates in a range of 0.5 to  
76 17.36 %<sup>11,12</sup>. Thus, quinoa accessions are typically homozygous inbred lines. Nonetheless,  
77 heterozygosity in some accessions has been reported, which indicates cross-pollination<sup>13</sup>. The  
78 inflorescences are panicles, which are often highly branched. Florets are tiny, which is a significant  
79 obstacle for hand-crossing. However, routine protocols for F<sub>1</sub> seed production in combination with  
80 marker-assisted selection have been developed recently<sup>14,15</sup>.

81 Systematic breeding of quinoa is still at its infancy compared to major crops. Until recently,  
82 breeding has been mainly limited to Bolivia<sup>16</sup> and Peru<sup>17</sup>, which are the major growing areas of  
83 quinoa. Therefore, quinoa can be regarded as a partially domesticated crop. Many accessions suffer  
84 from seed shattering, branching, and non-appropriate plant height, which are typical domestication  
85 traits. Apart from these characters, grain yield and seed size, downy mildew resistance,  
86 synchronized maturity, stalk strength, and low saponin content are major breeding objectives<sup>18</sup>. In  
87 the past years, activities have been intensified to breed quinoa genotypes adapted to temperate  
88 environments, for example, Europe, North America, and China<sup>19</sup>. Here, the major problem is the  
89 adaptation to long-day conditions because quinoa is predominantly a short-day plant due to its  
90 origin from regions near the equator.

91 There are only a few studies about the genetic diversity of quinoa. They were mainly based on  
92 phenotypic observations<sup>16,20</sup> and low throughput marker systems like random amplified  
93 polymorphic DNA<sup>21</sup>, amplification fragment length polymorphisms<sup>22</sup>, and microsatellites<sup>23</sup>. A  
94 limited number of single nucleotide polymorphisms (SNP) based on expressed sequence tags were  
95 published<sup>24</sup>. Maughan, et al.<sup>25</sup> used five bi-parental populations to identify ca. 14,000 SNPs, from  
96 which 511 KASP markers were developed. Genotyping 119 quinoa accessions gave the first insight  
97 into the population structure of this species<sup>25</sup>. Now, the availability of a reference genome enables  
98 genome-wide genotyping (Jarvis et al. 2017). Jarvis, et al.<sup>9</sup> re-sequenced 15 accessions and  
99 identified ca. 7.8 million SNPs. In another study, 11 quinoa accessions were re-sequenced, and 8  
100 million SNPs and ca. 842 thousand indels were identified<sup>26</sup>.

101 Our study aimed to analyze the population structure of quinoa and patterns of variation by re-  
102 sequencing a diversity panel encompassing germplasm from all over the world. Using millions of  
103 markers, we performed a genome-wide association study using multiple-year field data. Here, we  
104 identified QTLs that control agronomically important traits important for breeding cultivars to be  
105 grown under long-day conditions. We are discussing the fundamental differences between an  
106 underutilized crop and crops with a long breeding history. Our results provide useful information  
107 for further understanding the genetic basis of agronomically important traits in quinoa and will be  
108 instrumental for future breeding.

## 109 **Results**

### 110 **Re-sequencing 310 quinoa accessions reveals high sequence variation**

111 We assembled a diversity panel made of 310 quinoa accessions representing regions of major  
112 geographical distributions of quinoa (Supplementary Fig. 1). The diversity panel comprises  
113 accessions with different breeding history (Supplementary Table 1). We included 14 accessions  
114 from a previous study, of which 7 are wild relatives<sup>9</sup>. The sequence coverage ranged from 4.07 to  
115 14.55, with an average coverage of 7.78. We mapped sequence reads to the reference genome V2  
116 (CoGe id53523). Using mapping reads, we identified 45,330,710 single nucleotide polymorphisms  
117 (SNPs).

118

119

120

121

122

123

124 **Table 1:** Summary statistics of genome-wide single nucleotide polymorphisms identified in 303 quinoa accessions

| Parameter              | Type                                     | All genotypes (quinoa only) | Highland population   | Lowland population    |
|------------------------|------------------------------------------|-----------------------------|-----------------------|-----------------------|
| SNP                    | Total                                    | 2,872,935                   | 2,590,907             | 1,938,225             |
|                        | Intergenic                               | 2,452,347                   | 2,227,952             | 1,649,310             |
|                        | Introns                                  | 251,481                     | 101,546               | 172,692               |
|                        | Exons                                    | 114,654                     | 214,945               | 78,248                |
| Nucleotide diversity   |                                          |                             | $5.78 \times 10^{-4}$ | $3.56 \times 10^{-4}$ |
| Tajima's <i>D</i>      |                                          |                             | 0.884                 | -0.384                |
| Population divergences | <i>F<sub>ST</sub></i> (Weighted average) |                             | 0.36                  |                       |

125

126 After filtering the initial set of SNPs, we identified 4.5 million SNPs in total for the base SNP set.  
 127 We further filtered the SNPs for MAF >5 % (HCSNPs). We obtained 2.9 million high confident  
 128 SNPs for subsequent analysis (Supplementary Table 2). Across the whole genome, SNP density  
 129 was high, with an average of 2.39 SNPs/kb. However, SNP densities were highly variable between  
 130 genomic regions and ranged from 0 to 122 SNPs/kb (Supplementary Fig. 3). We did not observe  
 131 significant differences in SNP density between the two subgenomes (A subgenome 2.43 SNPs/kb;  
 132 B subgenome 2.35 SNPs/kb). Then, we split the SNPs by their functional effects as determined by  
 133 SnpEff<sup>27</sup>. Among SNPs located in non-coding regions, 598,383 and 617,699 SNPs were located  
 134 upstream (within 5kb from the transcript start site) and downstream (within 5kb from the stop site)  
 135 of a gene, whereas 114,654 and 251,481 SNPs were located within exon and intron sequences,  
 136 respectively (Table 1). We further searched for SNPs within coding regions. We found 70,604  
 137 missense SNPs and 41,914 synonymous SNPs within coding regions of 53,042 predicted gene  
 138 models.

### 139 Linkage disequilibrium and population structure of the quinoa diversity panel

140 Across the whole genome, LD decay between SNPs averaged 32.4 kb. We did not observe  
 141 substantial LD differences between subgenome A (31.9kb) and subgenome B (30.7kb)  
 142 (Supplementary Fig. 4C). The magnitude of LD decay among chromosomes did not vary drastically  
 143 except for chromosome Cq6B, which exhibited a substantially slower LD decay (Supplementary  
 144 Fig. 4 A and B).

145 Then, we unraveled the population structure of the diversity panel. We performed principal  
 146 component (PCA<sub>(SNP)</sub>), population structure, and phylogenetic analyses. PCA<sub>(SNP)</sub> showed two main  
 147 clusters consistent with previous studies<sup>13</sup>. The first and second principal components (PC1<sub>(SNP)</sub> and  
 148 PC2<sub>(SNP)</sub>) explained 23.35% and 9.45% of the variation, respectively (Fig. 1A). 202 (66.67%)  
 149 accessions were assigned to subpopulation 1 (SP1) and 101 (33.33%) to subpopulation 2 (SP2). SP1  
 150 comprised mostly Highland accessions, whereas Lowland accessions were found in SP2. PCA  
 151 demonstrated a higher genetic diversity of the Highland population (Fig. 1A). We also calculated  
 152 PCs for each chromosome separately. For 16 chromosomes, the same clustering as for the whole  
 153 genome was calculated. Nevertheless, two chromosomes, Cq6B, and Cq8B showed three distinct  
 154 clusters (Supplementary Fig. 5). This is due to the split of the Lowland population into two clusters.  
 155 We reason that gene introgressions on these two chromosomes from another interfertile group  
 156 might have caused these differences. This is also supported by a slower LD decay on chromosome  
 157 Cq6B (Supplementary Fig. 4B).

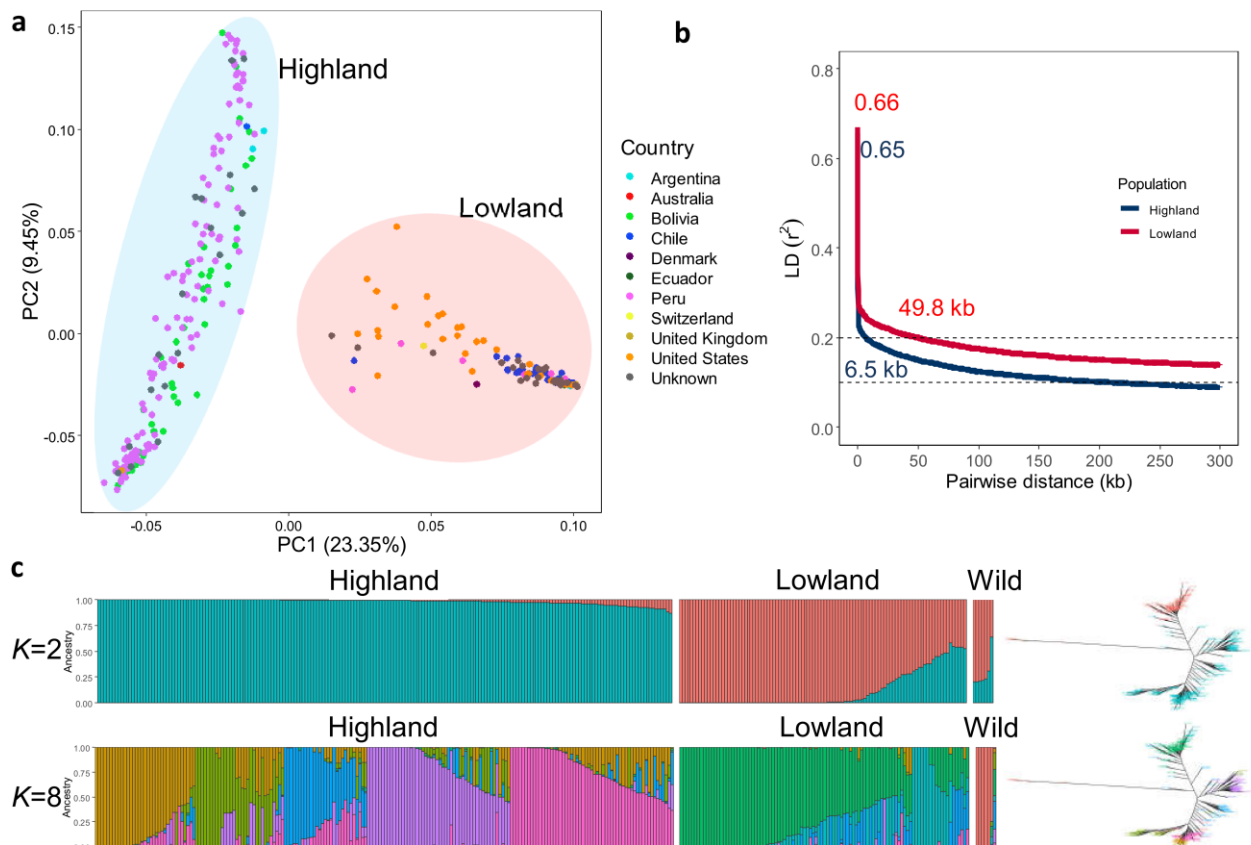

158

159 **Fig. 1:** Genetic diversity and population structure of the quinoa diversity panel. (a) PCA of 303 quinoa accessions. PC1  
 160 and PC2 represent the first two components of analysis, accounting for 23.35% and 9.45% of the total variation,  
 161 respectively. The colors of dots represent the origin of accessions. Two populations are highlighted by different colors:  
 162 Highland (light blue) and Lowland (pink). (b) Subpopulation wise LD decay in Highland (blue) and Lowland  
 163 population (red). (c) Population structure is based on ten subsets of SNPs, each containing 50,000 SNPs from the  
 164 whole-genome SNP data. Model-based clustering was done in ADMIXTURE with different numbers of ancestral  
 165 kinships ( $K=2$  and  $K=8$ ).  $K=8$  was identified as the optimum number of populations. Left: Each vertical bar represents  
 166 an accession, and color proportions on the bar correspond to the genetic ancestry. Right: Unrooted phylogenetic tree of  
 167 the diversity panel. Colors correspond to the subpopulation.

168 We also performed a population structure analysis with the ADMIXTURE software. We used cross-  
 169 validation to estimate the most suitable number of populations. Cross-validation error decreased as  
 170 the  $K$  value increased, and we observed that after  $K = 5$ , cross-validation error reached a plateau  
 171 (Supplementary Fig. 6B). We observed allelic admixtures in some accessions, likely owing to their  
 172 breeding history. The wild accessions were also clearly separated at the smallest cross-validation  
 173 error of  $K=8$ , except two *C. hircinum* accessions (Fig. 1C). The reason for this could be that because  
 174 *C. hircinum* is the closest crop wild relative, it also may have outcrossed with quinoa. The Highland  
 175 population was structured into five groups, while the Lowland accessions were split into two  
 176 subpopulations. The broad agro-climatic diversity of the Andean Highland germplasm might have  
 177 caused a higher number of subpopulations.

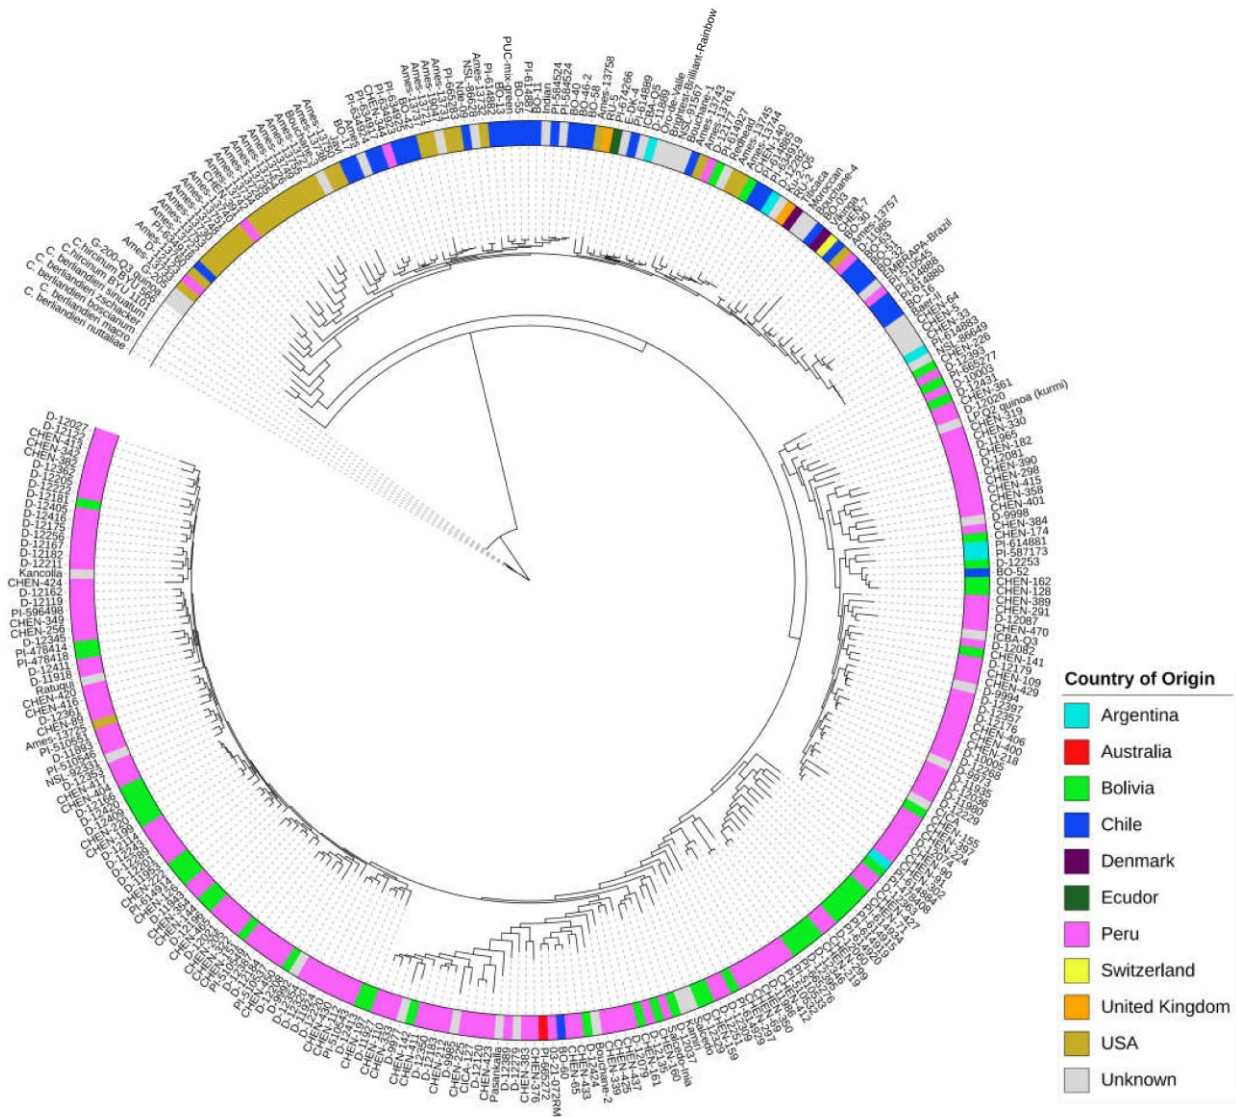

178

179 **Fig. 2:** Maximum likelihood tree of 303 quinoa and seven wild *Chenopodium* accessions from the diversity panel.  
 180 Colors are depicting the geographical origin of accessions.

181 We analyzed the phylogenetic relationships between quinoa accessions using 434,077 SNPs.  
 182 Constructing a maximum likelihood tree gave rise to five clades (Fig. 2). We found that the  
 183 placement of the wild quinoa species was concordant with the previous reports confirming that  
 184 quinoa was domesticated from *C. hircinum*<sup>9</sup>. However, we found that the *C. hircinum* accession  
 185 BYU 566 (from Chile) was placed at the base of both Lowland and Highland clades, which is in  
 186 contrast to Jarvis, et al.<sup>9</sup>, where this accession was placed at the base of coastal quinoa. As  
 187 expected, accessions from the USA and Chile are closely related because the USDA germplasm had  
 188 been collected at these geographical regions.

### 189 Genomic patterns of variations between Highland and Lowland quinoa

190 We were interested in patterns of variation in response to geographical diversification. We used  
 191 principal component analysis derived clusters and phylogenetic analysis to define two diverged  
 192 quinoa populations (namely Highland and Lowland). These divergent groups are highly correlated  
 193 with Highland and Lowland geographical origin. We used the base SNP set to analyze diversity  
 194 statistics. To detect genomic regions affected by the population differentiation, we measured the

195 level of nucleotide diversity using 10 kb non-overlapping windows<sup>28</sup>. Then we calculated the  
196 whole genome-wide LD decay across the two populations (Highland vs. Lowland); LD decayed  
197 more rapidly in Highland quinoa (6.5 kb vs. 49.8 kb) (Fig. 1B). To measure nucleotide diversity, we  
198 scanned the quinoa genome with non-overlapping windows of 10 kb in length in both populations  
199 separately. The nucleotide diversity of the Highland population ( $5.78 \times 10^{-4}$ ) was 1.62 fold higher  
200 compared to the Lowland population ( $3.56 \times 10^{-4}$ ) (Table 1 and Supplementary Fig. 7). We  
201 observed left-skewed distribution and negative Tajima's *D* value (-0.3883) in the Lowland  
202 populations indicating recent population growth (Table 1 and Supplementary Fig. 8). Genomic  
203 regions favorable for adaptation to Highlands should have substantially lower diversity in the  
204 Highland population than the Lowland population. Therefore, we calculated the nucleotide diversity  
205 ratios between Highland and Lowland to identify major genomic regions that are underlying the  
206 population differentiation. The  $F_{ST}$  value between populations was estimated to be 0.36, illustrating  
207 strong population differentiation. Concerning the regions of variants, the number of exonic SNPs is  
208 substantially higher in the Highland population (Table 1 and Supplementary Fig. 7).

## 209 Mapping agronomically important trait loci in the quinoa genome

210 We evaluated 13 qualitative and four dichotomous traits on 350 accessions across two different  
211 environments. At the time of the final harvest, 254 accessions did not reach maturity (senescence).  
212 All accessions produced seeds therefore used in seed analysis. For all traits, substantial phenotypic  
213 variation among accessions was found. High heritabilities were calculated for all quantitative traits  
214 except for number of branches (NoB) and stem lying (STL), which indicates that the phenotypic  
215 variation between the accessions is mostly caused by genetic variation (Supplementary Table 3).  
216 Trait correlations between years were also high (Supplementary Fig. 9), which is in accordance with  
217 the heritability estimates. We found the strongest positive correlation between days to maturity  
218 (DTM) and panicle length (PL), and plant height (PH) and PL, whereas the strongest negative  
219 correlation was found between DTM and thousand seed weight (TSW) (Supplementary Fig. 10).  
220 Then a principal component analysis was performed based on 12 quantitative traits ( $PCA_{(PHEN)}$ ) to  
221 explore the phenotypic relationship among quinoa accessions. The first two principal components  
222 explained 62.12% of the phenotypic variation between the accessions. The score plot of the  
223 principal components showed a similar clustering pattern as the SNP based PCA analysis  
224 ( $PCA_{(SNP)}$ ) (Fig. 1A and Supplementary Fig. 11A).  $PCA_{(PHEN)}$  variables factor map indicated that  
225 most Lowland accessions were high yielding with high TSW and dense panicles. Moreover, these  
226 accessions are early flowering and early maturing, and they are short (Supplementary Fig. 11B).  
227 Phenotype-based  $PCA_{(PHEN)}$  also showed that the Lowland accessions are better adapted/selected for  
228 cultivation in long-day photoperiods compared to the Highland accessions. These results are in  
229 accordance with LD, nucleotide diversity, and Tajima's *D* estimations, implying the Lowland  
230 accessions went through a stronger selection during breeding.

231 Then, we calculated the best linear unbiased estimates (BLUE) of the traits investigated. In total,  
232 294 accessions shared the re-sequencing information and phenotypes out of 350 phenotypically  
233 evaluated accessions. For GWAS analysis, we used ~2.9 million high-confidence SNPs. In total, we  
234 identified 1480 significant ( $P < 9.41e-7$ ) SNP-trait associations (MTA) for 17 traits (Supplementary  
235 Fig. 12). The number of MTAs ranged from 4 (STL) to 674 (DTM) (Supplementary Table 4). In  
236 agreement with previous reports, we defined an MTA as "consistent" when it was detected in both  
237 years<sup>29</sup>. We identified 600 consistent MTAs across eleven traits. TSW and DTM showed the highest  
238 number of "consistent" associations. Among these, 143 MTAs are located within a gene, and 22  
239 SNPs resulted in a missense mutation (Supplementary Table 5). MTA for the duration from bolting  
240 to flowering (DTB to DTF), NoB, Seed yield, STL, and growth type (GT) were not "consistent"  
241 between years (Supplementary Fig. 12). This is also reflected by the low heritability estimations of  
242 these traits, indicating considerably higher genotype x environment interactions.

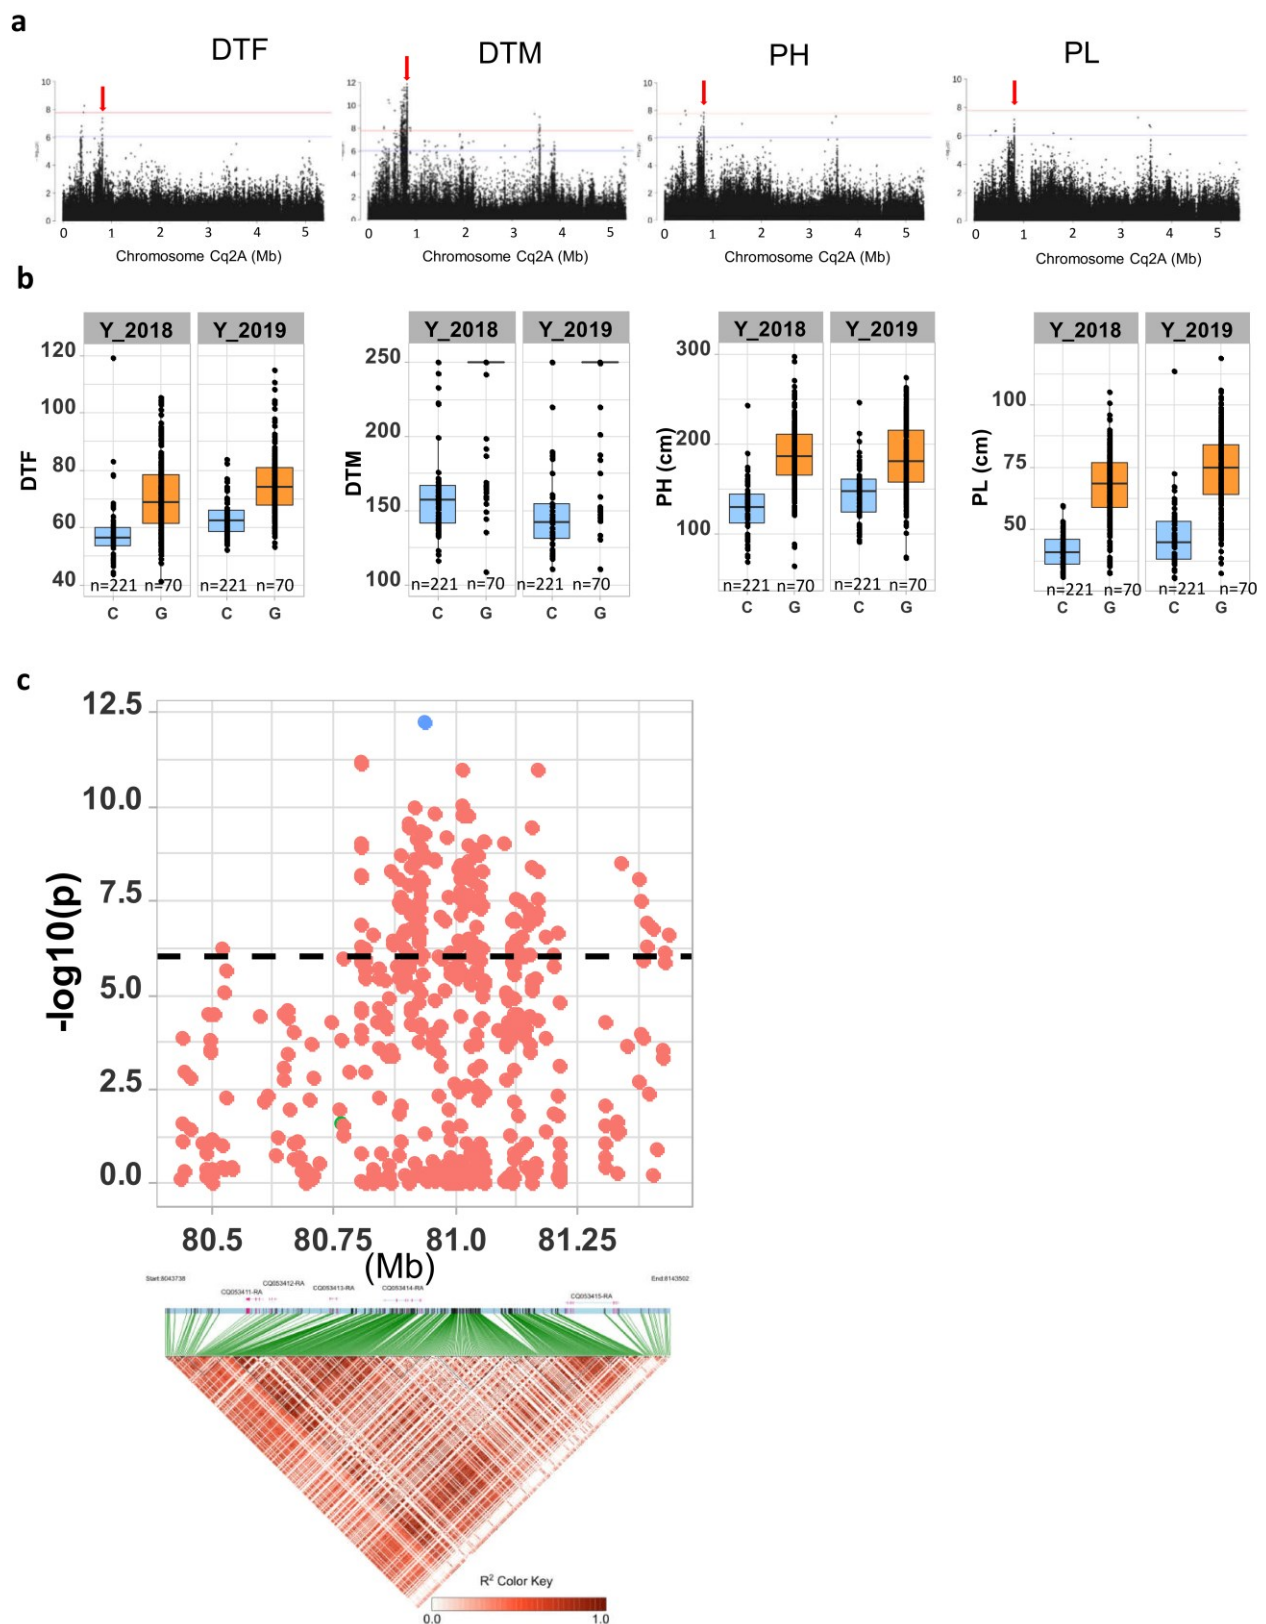

243

244 **Fig. 3:** Genomic regions associated with important agronomic traits (a) Significant marker-trait associations for days to  
 245 flowering, days to maturity, plant height, and panicle density on chromosome Cq2A. Red color arrows indicate the SNP  
 246 loci pleiotropically acting on all four traits. (b) Boxplots showing the average performance for four traits over two  
 247 years, depending on single nucleotide variation (C or G allele) within locus Cq2A\_8093547. (c) Local Manhattan plot  
 248 from region 80.40 - 81.43 Mb on chromosome Cq2A associated with PC1 of the days to flowering (DTF), days to



249 maturity (DTM), plant height (PH), and panicle length (PL), and local LD heat map (bottom). The colors represent the  
250 pairwise correlation between individual SNPs. Green color dots represent the strongest MTA (Cq2A\_ 8093547).

## 251 **Candidate genes for agronomically important traits**

252 First, we tested the resolution of our mapping study. We searched for major genes 50Kb down- and  
253 upstream of significant SNPs for two qualitative traits in quinoa, flower color, and seed saponin  
254 content. We identified highly significant MTAs for stem color on chromosome Cq1B (69.72-69.76  
255 Mb). There are two genes (*CqCYP76AD1* and *CqDODAI1*) from the associated loci displaying high  
256 homology to betalain synthesis pathway genes *BvCYP76AD1*<sup>30</sup> and *BvDODAI*<sup>31</sup> from sugar beet  
257 (Supplementary Fig. 14A and Supplementary Fig. 12). A significant MTA for saponin content on  
258 chromosome Cq5B between 8.85 Mb to 9.2 Mb harbored the two *BHLH25* genes which have been  
259 reported to control saponin content in quinoa<sup>9</sup> (Supplementary Fig. 14B and Supplementary Fig.  
260 12). This demonstrates that the marker density is high enough to narrow down to causative genes  
261 underlying a trait.

262 Then, we examined four quantitative traits. We found seven MTA on chromosome Cq2A that are  
263 associated with DTF, DTM, PH, and PL (cross-phenotype association), indicating evidence for  
264 pleiotropic gene action (Fig. 3 and Supplementary Table 6). For further confirmation and to  
265 investigate genes that are pleiotropically active on different traits, we followed a multivariate  
266 approach<sup>32</sup>. First, we performed a PCA using the four phenotypes (cross-phenotypes). We found  
267 89.94% of the variation could be explained by the first two principal components of the cross-  
268 phenotypes (PCA<sub>(CP)</sub>) (Supplementary Fig. 15). This indicates the adequate power of the PCA<sub>(CP)</sub> to  
269 reduce dimensions for the analysis of the cross-phenotypes association. We observed similar  
270 clustering as in PCA<sub>(SNP)</sub>. Therefore, these results indicate that in quinoa, DTF, DTM, PH, and PL  
271 are highly associated with population structure and thus, the adaptation to diverse environments.  
272 Then, we performed a GWAS analysis using the first three PCs as traits (PC-GWAS)  
273 (Supplementary Fig. 15C). We identified strong associations on chromosomes Cq2A, Cq7B (PC1),  
274 and Cq8B (PC2) (Supplementary Fig. 16). Out of 468 MTAs (PC1:426 and PC2: 42) across the  
275 whole genome, 222 (PC1:211 and PC2:11) are located within 95 annotated genes. We found 14  
276 SNPs that changed the amino acid sequence in 12 predicted protein sequences of associated genes  
277 (Supplementary Table 5). In the next step, we searched genes located within 50kb to an MTA.  
278 Altogether, 605 genes were identified (PC1:520 and PC2:85) (Supplementary Table 7).

279 We found the region 80.50 -81.50 Mb on chromosome Cq2A to be of special interest because it  
280 displays stable pleiotropic MTA for DTF, DTM, PH, and PL. The most significant SNP is located  
281 within the *CqGLX2-2* gene, which encodes an enzyme of the glyoxalase family (Fig. 3). The  
282 Arabidopsis *GLX2-1* has been shown to be essential for growth under abiotic stress<sup>33</sup>. The allele  
283 carrying a cytosine at the position with the most significant SNP resulted in early flowering,  
284 maturing, and short panicles and plants (Fig. 3b). These traits are essential for the adaptation to  
285 long-day conditions.

286 Thousand seed weight is an important yield component. We found a strong MTA between 63.2 –  
287 64.87 Mb on chromosome Cq8B. Significantly associated SNPs were localized within two genes  
288 (Fig. 4). One gene displays homology to *PP2C* encoding a member of the phosphatase-2C (*PP2C*)  
289 protein family, which participates in Brassinosteroids signaling pathways and controls the  
290 expression of the transcription factor *BZR1*<sup>34</sup>. The second gene encodes a member of the RING-  
291 type E3 ubiquitin ligase family. These genes are controlling seed size in soybean, maize, rice,  
292 soybean, and Arabidopsis<sup>35</sup>. We then checked haplotype variation and identified 5 and 7  
293 haplotypes for *CqPP2C* and *CqRING* genes, respectively. Accessions carrying PP2C\_hap3 and  
294 RING\_hap7 displayed larger seeds in both years (Fig. 4 and Supplementary Fig. 17)

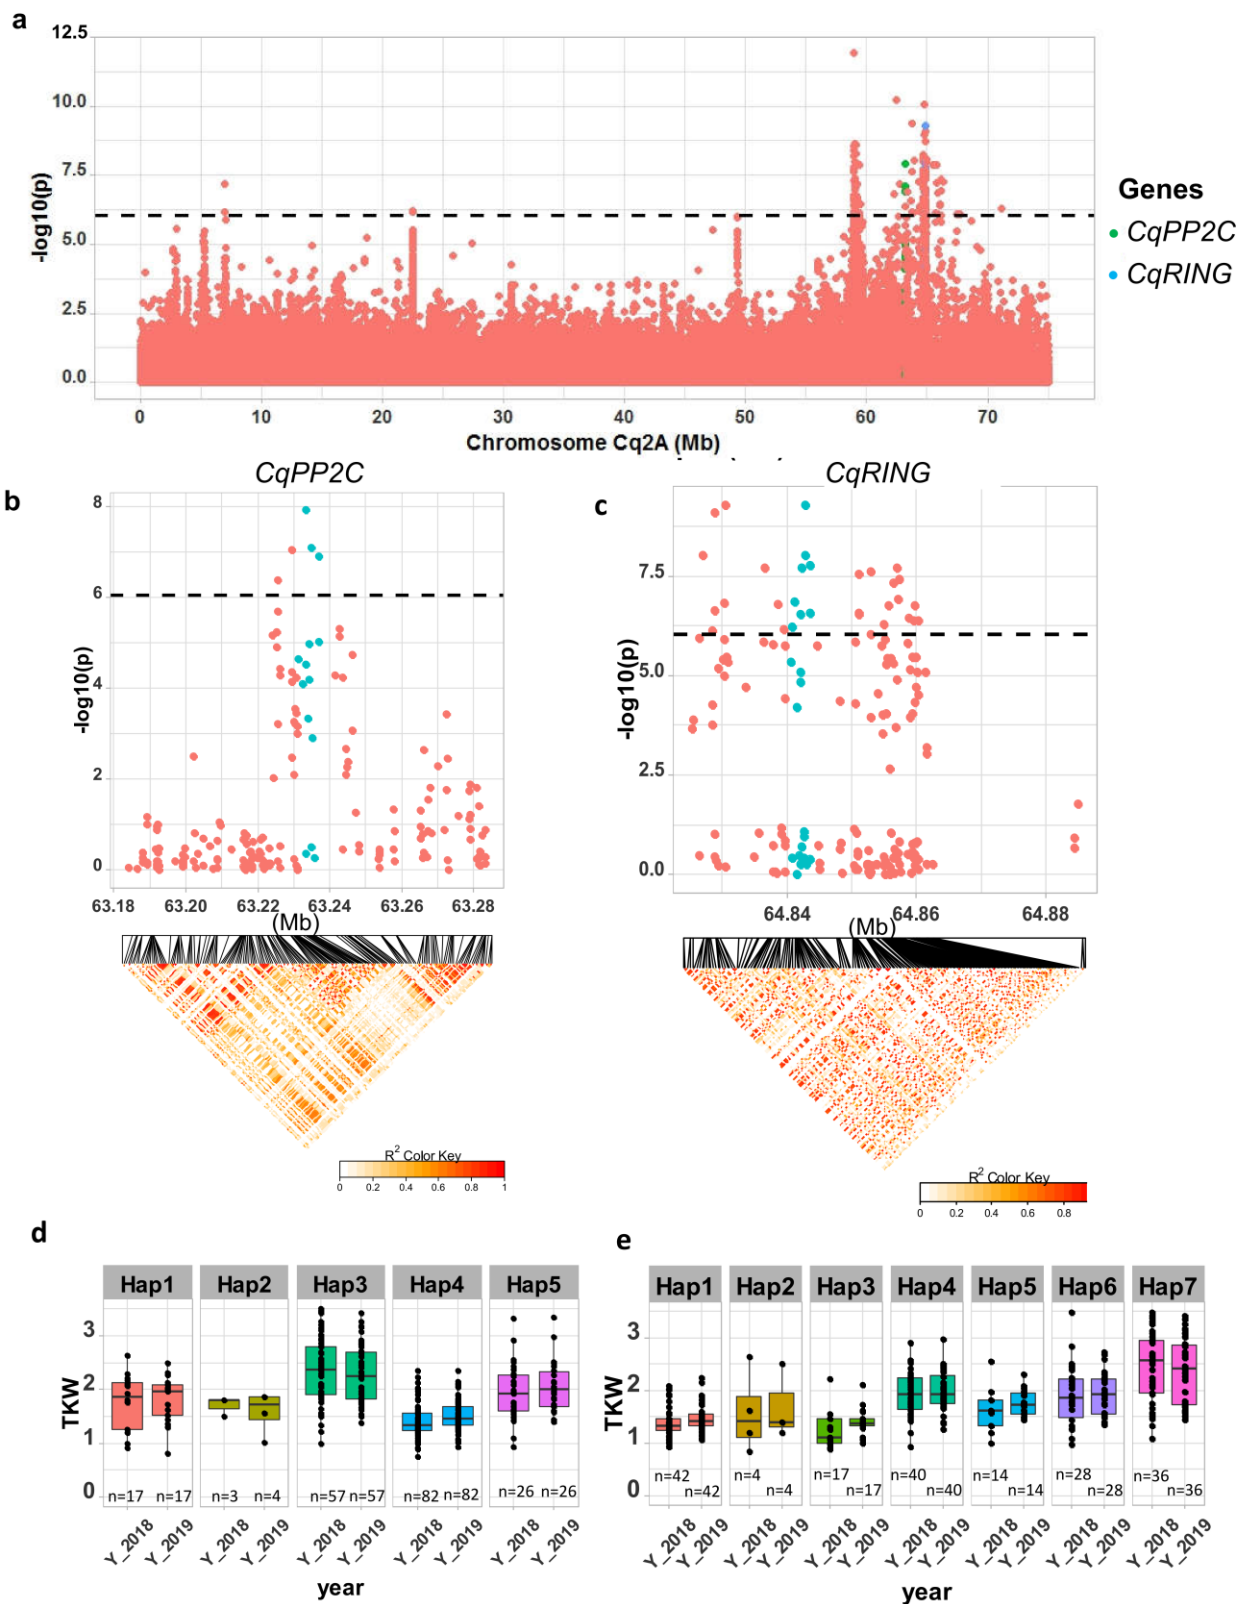

295

296  
297  
298  
299  
300

**Fig. 4:** Identification of candidate genes for thousand seed weight. (a) Manhattan plot from chromosome Cq8B. Green and blue dots are depicting the *CqPP2C5* and the *CqRING* gene, respectively. (b) Top: Local Manhattan plot in the neighborhood of the *CqPP2C* gene. Bottom: LD heat map. (c) Top: Local Manhattan plot in the neighborhood of the *CqRING* gene. Bottom: LD heat map. Differences in thousand seed weight between five *CqPP2C* (d) and seven *CqRING* haplotypes (e).

301 Downy mildew is one of the major diseases in quinoa, which causes massive yield damage.  
302 Notably, our GWAS identified strong MTA for resistance against this disease. The most significant  
303 SNPs are located in subgenome A (Supplementary Fig. 12). Thus, the A-genome progenitor seems  
304 to be the donor of downy mildew resistance. We identified a candidate gene within a region 38.99 -  
305 39.03 Mb on chromosome Cq2A, which showed the highest significant association (Supplementary  
306 Fig. 14C). This gene encodes a protein with an NBS-LRR (nucleotide-binding site leucine-rich  
307 repeat) domain often found in resistance gene analogs with a function against mildew infection <sup>36</sup>.

## 308 Discussion

309 We assembled a diversity set of 303 quinoa accessions and seven accessions from wild relatives.  
310 Plants were grown under northern European conditions, and agronomically important traits were  
311 studied. In total, 2.9 million SNPs were found after re-sequencing. We found substantial phenotypic  
312 and genetic variation. Our diversity set was structured into two highly diverged populations, and  
313 genomic regions associated for this diversity were localized. Due to a high marker density,  
314 candidate genes controlling qualitative and quantitative traits were identified. The high genetic  
315 diversity and rapid LD breakdown are reflecting the short breeding history of this crop.

316 We were aiming to assemble the first diversity set, which represents the genetic variation of this  
317 species. Therefore, we established a permanent resource that is genotypically and phenotypically  
318 characterized. We believe that this collection is important for future studies due to the following  
319 reasons: We observed substantial phenotypic variation for all traits and high homogeneity within  
320 accessions. Moreover, low or absent phenotypic variation within accessions demonstrates  
321 homogeneity as expected for a self-pollinating species. Therefore, the sequence of one plant is  
322 representative of the whole accession, which is important for the power of the GWAS.

323 Today, over sixteen thousand accessions of quinoa are stored *ex-situ* in seed banks in more than 30  
324 countries <sup>37</sup>. Despite the enormous diversity, only a few accessions have been genotyped with  
325 molecular markers. We found a clear differentiation into Highland and Lowland quinoa. In previous  
326 studies, five ecotypes had been distinguished: Valley type, Altiplano type, Salar type, Sea level  
327 type, and Subtropical type <sup>19</sup>. Adaptation to different altitudes, tolerance to abiotic stresses such as  
328 drought and salt, and photoperiodic responses are the major factors determining ecotypes <sup>18</sup>. In our  
329 study, we could further allocate the quinoa accessions to five Highland and two Lowland  
330 subpopulations. This demonstrates the power of high-density SNP mapping to identity finer  
331 divisions at higher *K*. The origin of accessions and ecotype differentiation could be meaningfully  
332 interpreted by combining the information from phylogenetic data and population structure. As we  
333 expected, North American accessions (accessions obtained from USDA) were clustering with  
334 Chilean accessions, suggesting sequence-based characterization of ecotypes would be more  
335 informative and reproducible. Moreover, high-density SNP genotyping unveiled the origin of  
336 unknown or falsely labeled gene bank accessions, as recently proposed by Milner, et al. <sup>38</sup>. The  
337 geographical origin of 52 accessions from our panel was unknown. We suggest using phylogenetic  
338 data and admixture results to complement the available passport data. For instance, two accessions  
339 with origin recorded as Chile are closely related to Peruvian and Bolivian accessions, which  
340 suggests that they are also originating from Highland quinoa.

341 What can we learn about the domestication of quinoa and its breeding history by comparing our  
342 results with data from other crops? LD decay is one parameter reflecting the intensity of breeding.  
343 LD decay in quinoa (32.4 kb) is faster than in most studies with major crop species, e.g. rapeseed  
344 (465.5 kb) <sup>39</sup>, foxtail millet (*Setaria italica*, 100 kb) <sup>40</sup>, pigeonpea (*Cajanus cajan*, 70 kb) <sup>41</sup>,  
345 soybean (150 kb) <sup>42</sup> and rice (200 kb) <sup>43</sup>. Although comparisons must be regarded with care due to  
346 different numbers of markers and accessions, different types of reproduction, and the selection

347 intensity, the rapid LD decay in quinoa reflects its short breeding history and low selection  
348 intensity. Moreover, quinoa is a self-pollinating species where larger linkage blocks could be  
349 expected. However, cross-pollination rates in some accessions can be up to 17.36 %<sup>12</sup>, which is  
350 exploited by small Andean farmers who grow mixed quinoa accessions to ensure harvest under  
351 different biotic and abiotic stresses. This may facilitate a certain degree of cross-pollination and  
352 admixture.

353 Interestingly, the LD structure between Highland and Lowland populations is highly contrasting  
354 (6.5 vs. 49.8 kb), indicating larger LD blocks in the Lowland population. Low nucleotide diversity  
355 and negative Tajima's *D* were also observed in the Lowland population compared to Highland  
356 quinoa. The population differentiation index and LD differences have been used to test the  
357 hypothesis of multiple domestication events. As an example, different domestication bottlenecks  
358 have been reported for japonica (LD decay: 65 kb) and indica rice (LD decay: 200 kb)<sup>44</sup>. The  
359 estimated *F<sub>ST</sub>* value from this study (0.36) is in the similar range of *F<sub>ST</sub>* estimates in rice subspecies  
360 *indica* and *japonica* (0.55)<sup>45</sup> and melon (*Cucumis melo*) subspecies *melo* and *agrestis* (0.46)<sup>46</sup>.  
361 Two hypotheses have been proposed for the domestication of quinoa from *C. hircinum*; (1) one  
362 event that gave rise to Highland quinoa and subsequently to Lowland quinoa and (2) two separate  
363 domestication events giving rise to Highland and Lowland quinoa independently<sup>9</sup>. However, our  
364 study is not strictly following the second hypothesis because *C. hircinum* accession BYU 566 was  
365 basal to both clades of the phylogenetic tree (Highland and Lowland). Moreover, our wild  
366 Chenopodium germplasm does not represent enough diversity for in-depth analysis of  
367 domestication events. Therefore, we propose three possible scenarios to explain strong differences  
368 in LD structure, nucleotide diversity, Tajima's *D* and *F<sub>ST</sub>*, (1) two independent domestication events  
369 with a strong bottleneck on lowland populations, (2) a single domestication but strong population  
370 growth after adaptation of lowland quinoa or (3) strong adaptive selection after domestication. To  
371 understand the history and genetics of domestication, it will be necessary to sequence a large  
372 representative set of outgroup species such as *C. berlandieri*, *C. hircinum*, *C. pallidicaule*, and *C.*  
373 *suecicum*.

374 Apart from marker density and sample size, the power of GWAS depends on the quality of the  
375 phenotypic data. Plants were grown in Northern Europe. Therefore, the MTAs are, first of all,  
376 relevant for temperate long-day climates. The share of genetic variances and thus, the heritabilities  
377 were high across environments. We expect higher genotype x environment interaction for flowering  
378 time, days to maturity, plant height, and panicle length if short-day environments will be included  
379 because many accessions have a strong day-length response (data not shown). Furthermore, the  
380 positions of genes controlling Mendelian traits were precisely coinciding with significant SNP  
381 positions, as exemplified by the genes associated with saponin content and flower color. Hence, the  
382 diversity panel provides sufficient power to identify SNP-trait associations for important agronomic  
383 traits such as TSW and downy mildew tolerance. In different plant species, seed size is controlled  
384 by six different pathways<sup>35</sup>. We found two important genes controlling seed size from the  
385 Brassinosteroid (*CqPP2C*) and the ubiquitin-proteasome (*CqRING*) pathway. The non-functional  
386 allele of soybean *PP2C1* resulted in small seeds<sup>34</sup>. We detected a superior haplotype (PP2C\_hap3),  
387 which results in larger seeds. *CqRING* encodes an E3 ubiquitin ligase protein. There are two RING-  
388 type E3 ubiquitins known as *DA1* and *DA2*, which are involved in seed size controlling pathway.  
389 They were found in Arabidopsis rice, maize, and wheat. Downy mildew is the most acute disease  
390 for quinoa, caused by the fungus *Peronospora variabilis*<sup>47</sup>. A recent study attempted identification  
391 of genes based on a GWAS analysis. However, no significant associations were found, probably  
392 due to the lack of power because of the small number of accessions used (61 and 88)<sup>48</sup>. In our  
393 study, a strong MTA suggests that the NBS-LRR gene on chromosome Cq2A contributes to downy  
394 mildew resistance in quinoa. We propose using this sequence for marker-assisted selection in  
395 segregating F<sub>2</sub> populations produced during pedigree breeding of quinoa.

396 In this study, the advantage of multivariate analysis of cross-phenotype association became obvious.  
397 We could identify candidate genes with a pleiotropic effect on days to flowering, days to maturity,  
398 plant height, and panicle length. Interestingly, the most significant SNP was residing within a  
399 putative *GLX-2* ortholog. *GLX* genes, among other functions, have been shown to impact cell  
400 division and proliferation in *Amaranthus paniculatus*<sup>49</sup>. Therefore, the *CqGLX-2* gene is one  
401 candidate for controlling day length response.

402 This study also has a major breeding perspective. We aimed to elucidate the potential of quinoa for  
403 cultivation in temperate climates. Evidently, many accessions are not adapted to northern European  
404 climate and photoperiod conditions because they flowered too late and did not reach maturity before  
405 October. Nevertheless, 48 accessions are attractive as crossing partners for breeding programs  
406 because they are insensitive to photoperiod or long-day responsive. Moreover, they are attractive  
407 due to their short plant height, low tillering capacity, favorable inflorescence architecture, and high  
408 TSW. These are important characters for mechanical crop cultivation and combine harvesting. The  
409 MTA found in this study offers a perspective to use parents with superior phenotypes in crossing  
410 programs. We suggest a genotype building strategy by pyramiding favorable alleles (haplotypes). In  
411 this way, also accessions from our diversity set, which are not adapted to long-day conditions but  
412 with favorable agronomic characters, will be considered. Then, favorable genotypes will be  
413 identified from offspring generations by marker-assisted selection using markers in LD with  
414 significant SNPs. Furthermore, the MTA from this study will be useful for allele mining in quinoa  
415 germplasm collections to identify yet unexploited genetic variation.

## 416 **Materials and Methods**

### 417 **Plant materials and growth conditions**

418 We selected 350 quinoa accessions for phenotyping, and of these, 296 were re-sequenced in this  
419 study. Re-sequencing data of 14 additional accessions that had already been published<sup>9</sup> were also  
420 included in the study, together with the wild relatives (*C. belandieri* and *C. hircinum*)<sup>9</sup>. These  
421 accessions represent different geographical regions of quinoa cultivation (Supplementary Table 1).  
422 Plants were grown in the field in Kiel, Northern Germany, in 2018 and 2019. Seeds were sown in  
423 the second week of April in 35x multi-tray pots. Then plants were transplanted to the field in the  
424 first week of May as single-row plots in a randomized complete block design with three blocks. The  
425 distances between rows and between plants were set to 60 cm and 20 cm, respectively. Each row  
426 plot contained seven plants per accession.

427 We recorded days to bolting (DTB) as BBCH51 and days to flowering (DTF) as BBCH60 twice a  
428 week during the growth period. Days to maturity (DTM) was determined when plants reached  
429 complete senescence (BBSHC94). If plants did not reach this stage, DTM was set as 250 days. In  
430 both years, plants were harvested in the second week of October. Plant height (PH), panicle length  
431 (PL), and the number of branches (NoB) were phenotyped at harvest. Stem lying (STL)  
432 (Supplementary Fig. 2) was scored on a scale from one to five, where score one indicates no stem  
433 lying. Similarly, panicle density was recorded on a scale from one to seven, where density one  
434 represents lax panicles, and panicle density seven represents highly dense panicles. Flower color  
435 and stem color were determined by visual observation. Pigmented and non-pigmented plants were  
436 scored as 1 and 0, respectively. Growth type was classified into two categories and analyzed as a  
437 dichotomous trait as well. We observed severe mildew infection in 2019. Therefore, we scored  
438 mildew infection on a scale from 1 to 3, where 1 equals no infection, and 3 equals severe infection.

## 439 **Statistical analysis**

440 We calculated the best linear unbiased estimates of the traits across years by fitting a linear mixed  
441 model using the lme4 R package <sup>50</sup>. We used the following model:

$$442 Y_{ijk} = \mu + \text{Accession}_i + \text{Block}_j + \text{Year}_k + (\text{Accession} \times \text{Block})_{ij} + (\text{Accession} \times \text{Year})_{ik} + \text{Error}_{ijk}$$

443 Where  $\mu$  is the mean,  $\text{Accession}_i$  is the genotype effect of the  $i$ -th accession,  $\text{Block}_j$  is the effect of  
444 the  $j$ -th Block,  $\text{Year}_k$  is the effect of the  $k$ -th year,  $(\text{Accession} \times \text{Block})_{ij}$  is the Accession-Block  
445 interaction effect,  $\text{Accession} \times \text{Year}_{ik}$  is the accession-year interaction effect,  $\text{Error}_{ijk}$  is the error of  
446 the  $j$ -th block in the  $k$ -th year. We treated all items as random effects for heritability estimation, and  
447 for best linear unbiased estimates (BLUE), accessions were treated as fixed effects. We analyzed the  
448 principle components of phenotypes using the R package FactoMineR <sup>51</sup>.

## 449 **Genome sequencing and identification of genomic variations**

450 For DNA extraction, two plants per genotype were grown in a greenhouse at the University of  
451 Hohenheim, and two leaves from a single two-months old plant were collected and frozen  
452 immediately. DNA was subsequently extracted using the AX Gravity DNA extraction kit (A\&A  
453 Biotechnology, Gdynia, Poland) following the manufacturer's instructions. Purity and quality of  
454 DNA were controlled by agarose gel electrophoresis and the concentration determined with a Qubit  
455 instrument using SYBR green staining. Whole-genome sequencing was performed for 312  
456 accessions at Novogene (China) using short-reads Illumina NovaSeq S4 Flowcell technology and  
457 yielded an average of 10 Gb of paired-end (PE) 2 x 150 bp reads with quality  $Q > 30$  Phred score per  
458 sample, which is equivalent to  $\sim 7X$  coverage of the haploid quinoa genome ( $\sim 1.45$  Gb). We then  
459 used an automated pipeline ([https://github.com/IBEXCluster/IBEX-](https://github.com/IBEXCluster/IBEX-SNPcaller/blob/master/workflow.sh)  
460 [SNPcaller/blob/master/workflow.sh](https://github.com/IBEXCluster/IBEX-SNPcaller/blob/master/workflow.sh)) compiled based on the Genome Analysis Toolkit. Raw  
461 sequence reads were filtered with trimmomatic-v0.38 <sup>52</sup> using the following criteria: LEADING:20;  
462 TRAILING:20; SLIDINGWINDOW:5:20; MINLEN:50. The filtered paired-end reads were then  
463 individually mapped for each sample against an improved version of the QQ74 quinoa reference  
464 genome (CoGe id53523) using BWA-MEM (v-0.7.17) <sup>53</sup> followed by sorting and indexing using  
465 samtools (v1.8) <sup>54</sup>. Duplicated reads were marked, and read groups were assigned using the Picard  
466 tools (<http://broadinstitute.github.io/picard/>). Variants were identified with GATK (v4.0.1.1) <sup>55 56</sup>  
467 using the "--emitRefConfidence" function of the HaplotypeCaller algorithm and "--heterozygosity"  
468 value set at 0.005 to call SNPs and InDels for each accession. Individual g.vcf files for each sample  
469 were then compressed and indexed with tabix (v-0.2.6) <sup>57</sup> and combined into chromosome g.vcf  
470 using GenomicsDBImport function of GATK. Joint genotyping was then performed for each  
471 chromosome using the function GenotypeGVCFs of GATK. To obtain high confidence variants, we  
472 excluded SNPs with the VariantFiltration function of GATK with the criteria:  $QD < 2.0$ ;  $FS > 60.0$ ;  
473  $MQ < 40.0$ ;  $MQRankSum < -12.5$ ;  $ReadPosRankSum < -8.0$  and  $SOR > 3.0$ . Then, SNP loci  
474 which contained more than 70% missing data, were filtered by VCFtools <sup>58</sup> (v0.1.5), which resulted  
475 in our initial set of  $\sim 45M$  SNPs for all the 332 accessions, including 20 previously re-sequenced  
476 accessions <sup>9</sup>. All resequencing data are submitted to SRA under project id BioProject  
477 PRJNA673789.

478 In our panel, we had three triplicates for quality checking and nine duplicates between Jarvis et al.  
479 2017 and 312 newly re-sequenced accessions. In order to remove duplicates, as a preliminary  
480 analysis, we removed SNP loci with a minimum mean-depth  $< 5$  across samples and SNP loci with  
481 more than 5% missing data. Then, we filtered SNPs with a minor allele frequency lower than 0.05  
482 ( $MAF < 0.05$ ). After these filtering steps, we obtained a VCF file that contained 229,017 SNPs.  
483 Then, we construct a maximum likelihood (ML) tree. First, we used the modelFinder <sup>59</sup> in IQ-TREE

484 v1.6.619 (Nguyen et al. 2015) to determine the best model for ML tree construction. We selected  
485 GTR+F+R8 (GTR: General time-reversible, F: Empirical base frequencies, R8: FreeRate model) as  
486 the best fitting model according to the Bayesian Information Criterion (BIC) estimated by the  
487 software. We used 1000 replicates with ultrafast bootstrapping (UFboots)<sup>60</sup> to check the reliability  
488 of the phylogenetic tree. To visualize the phylogenetic tree, we used the Interactive Tree Of Life  
489 tool (<https://itol.embl.de/>)<sup>61</sup>. Then, based on the phylogenetic tree, we removed duplicate accessions  
490 and accessions with unclear identity. After the quality control, we retained 310 accessions (303  
491 quinoa accessions and 7 wild *Chenopodium* accessions).

492 Then we used the initial SNP set and defined two subsets using the following criteria: (1) A base  
493 SNP set of 5,817,159 biallelic SNPs obtained by removing SNPs with more than 50% missing  
494 genotype data, minimum mean depth less than five, and minor allele frequency less than 1%. (2) A  
495 high confidence (HCSNP) set of 2,872,935 SNPs from the base SNP set by removing SNPs with a  
496 minor allele frequency of less than 5%. The base SNP set was used for the diversity statistics, and  
497 the HCSNPs set was used for GWAS analysis.

498 We annotated the HCSNP using SnpEff 4.3T<sup>27</sup> and a custom database<sup>27</sup> based on the QQ74  
499 reference genome and annotation (CoGe id53523). Afterward, we extracted the SNP annotations  
500 using SnpSift<sup>62</sup>. Based on the annotations, SNPs were mainly categorized into five groups, (1)  
501 upstream of the transcript start site (5kb), (2) downstream of the transcript stop site (5kb), (3)  
502 coding sequence (CDS), (4) intergenic, and (5) intronic. We used SnpEff to categorize SNPs in  
503 coding regions based on their effects such as synonymous, missense, splice acceptor, splice donor,  
504 splice region, start lost, start gained, stop lost, and spot retained.

## 505 **Phylogenetic analysis and population structure analysis**

506 For population structure analysis, we employed SNP subsets, as demonstrated in previous studies,  
507 to reduce the computational time<sup>63</sup>. We created ten randomized SNP sets, each containing 50,000  
508 SNPs. To create subsets, first, the base SNP set was split into 5000 subsets of an equal number of  
509 SNPs. Then, 10 SNPs from each subset were randomly selected, providing a total of 50,000 SNPs  
510 in a randomized set (randomized 50k set). We then repeated this procedure for nine more times and  
511 finally obtained ten randomized 50k sets. Population structure analysis was conducted using  
512 ADMIXTURE (Version: 1.3)<sup>64</sup>. We ran ADMIXTURE for each subset separately with a  
513 predefined number of genetic clusters K from 2 to 10 and varying random seeds with 1000  
514 bootstraps. Also, we performed the cross-validation (CV) procedure for each run. Obtained Q  
515 matrices were aligned using the greedy algorithm in the CLUMPP software<sup>65</sup>. Population structure  
516 plots were created using custom R scripts. We then combined SNP from the ten subsets to create a  
517 single SNP set of 434,077 unique SNPs for the phylogenetic analysis. We used the same method  
518 mentioned above to create the phylogenetic tree. Here we selected the model GTR+F+R6 based on  
519 the BIC estimates. For the principal component analysis (PCA) we used the HCSNP set and  
520 analysis was done in R package SNPrelate<sup>66</sup>. We estimated the top 10 principal components. The  
521 first (PC1) and second (PC2) were plotted using custom R scripts.

## 522 **Genomic patterns of variations**

523 Using the base SNP set, we calculated nucleotide diversity ( $\pi$ ) for subpopulations and  $\pi$  ratios for  
524 Highland and Lowland population regions with the top 1% ratios of  $\pi_{\text{Highland}} / \pi_{\text{Lowland}}$  candidate  
525 regions for population divergence. We also estimated Tajima's *D* values for both populations to  
526 check the influence of selection on populations.  $F_{ST}$  values were calculated between Highland and  
527 Lowland populations using the 10kb non-overlapping window approach. Nucleotide diversity,  
528 Tajima's *D*, and  $F_{ST}$  calculations were carried out in VCFtools (v0.1.5)<sup>58</sup>.

## 529 Linkage disequilibrium analysis

530 First, we calculated linkage disequilibrium in each population separately (Highland and Lowland).  
531 Then, LD was calculated in the whole population, excluding wild accessions. For LD calculations,  
532 we further filtered the HCSNP set by removing SNPs with >80% missing data<sup>29</sup>. Using a set of  
533 2,513,717 SNPs, we calculated the correlation coefficient ( $r^2$ ) between SNPs up to 300kb apart by  
534 setting -MaxDist 300 and default parameters in the PopLDdecay software<sup>67</sup>. LD decay was plotted  
535 using custom R scripts based on the ggplot2 package.

## 536 Genome-wide association study

537 We used the best linear unbiased estimates (BLUE) of traits and HCSNPs for the GWAS analysis.  
538 Morphological traits were treated as dichotomous traits and analyzed using generalized mixed linear  
539 models with the lme4 R software package<sup>50</sup>. We used population structure and genetic relationships  
540 among accessions to minimize false-positive associations. Population structure represented by the  
541 PC was estimated with the SNPrelate software<sup>66</sup>. Genetic relationships between accessions were  
542 represented by a kinship matrix calculated with the efficient mixed-model association expedited  
543 (EMMAX) software<sup>68</sup> using HCSNPs. Then, we performed an association analysis using the mixed  
544 linear model, including K and P matrices in EMMAX. We estimated the effective number of SNPs  
545 ( $n=1,062,716$ ) using the Genetic type I Error Calculator (GEC)<sup>69</sup>. We set the significant *P*-value  
546 threshold (Bonferroni correction,  $0.05/n$ ,  $-\log_{10}(4.7e-08)=7.32$ ) and suggestive significant threshold  
547 ( $1/n$ ,  $-\log_{10}(9.41e-7)=6.02$ ) to identify significant loci underlying traits. We plotted SNP *P*-values  
548 on Manhattan plots using the qqman R package<sup>70</sup>.

## 549 Acknowledgments

550 We thank David Jarvis for providing the updated version of the quinoa reference genome. We thank  
551 Monika Bruisch, Brigitte Neidhardt-Olf, Elisabeth Kokai-Kota, Verena Kowalewski, and Gabriele  
552 Fiene for technical assistance. The financial support of this work was provided by the Competitive  
553 Research Grant (Grant No. OSR-2016-CRG5- 466 2966-02) of the King Abdullah University of  
554 Science and Technology, Saudi Arabia and baseline funding from KAUST to Mark Tester.

## 555 Author contributions

556 C.J, M.T, and N.E directed the project and conceived the research. D.S.R.P conducted genomic data  
557 analysis and GWAS analysis. D.S.R.P and N.E performed field experiments and phenotyping. E.R  
558 conducted SNP identifications. G.W and S.M.S selected and assembled the diversity panel. K.S  
559 contributed to DNA isolation, library preparation for genome sequencing. D.S.R.P, together with all  
560 authors, wrote and finalized the manuscript.

## 561 Competing interests

562 The authors declare no competing interests.

## 563 Data availability

564 The raw sequencing data have been submitted to the NCBI Sequence Read Archive (SRA) under  
565 the BioProject PRJNA673789. Quinoa reference genome version 2 is available at CoGe database  
566 under genome id 53523. Source data are provided with the paper.



## 567 Code availability

568 Custom scripts used for SNP calling are available on GitHub:  
569 <https://github.com/IBEXCluster/IBEX-SNPcaller/blob/master/workflow.sh>. Additional information  
570 on other custom scripts will be available upon request.

## 571 References

- 572 1. Stetter, M.G., Gates, D.J., Mei, W. & Ross-Ibarra, J. How to make a domesticate. *Current*  
573 *Biology* **27**, R896-R900 (2017).
- 574 2. Li, T. *et al.* Domestication of wild tomato is accelerated by genome editing. *Nature*  
575 *biotechnology* **36**, 1160-1163 (2018).
- 576 3. Ruiz, K.B. *et al.* Quinoa biodiversity and sustainability for food security under climate  
577 change. A review. *Agronomy for sustainable development* **34**, 349-359 (2014).
- 578 4. González, J.A., Eisa, S., Hussin, S. & Prado, F.E. Quinoa: an Incan crop to face global  
579 changes in agriculture. *Quinoa: Improvement and sustainable production*, 1-18 (2015).
- 580 5. James, L.E.A. Quinoa (*Chenopodium quinoa* Willd.): composition, chemistry, nutritional,  
581 and functional properties. *Advances in food and nutrition research* **58**, 1-31 (2009).
- 582 6. Vega-Gálvez, A. *et al.* Nutrition facts and functional potential of quinoa (*Chenopodium*  
583 *quinoa* willd.), an ancient Andean grain: a review. *Journal of the Science of Food and*  
584 *Agriculture* **90**, 2541-2547 (2010).
- 585 7. Palomino, G., Hernández, L.T. & de la Cruz Torres, E. Nuclear genome size and  
586 chromosome analysis in *Chenopodium quinoa* and *C. berlandieri* subsp. *nuttalliae*.  
587 *Euphytica* **164**, 221 (2008).
- 588 8. Kolano, B., Siwinska, D., Pando, L.G., Szymanowska-Pulka, J. & Maluszynska, J. Genome  
589 size variation in *Chenopodium quinoa* (Chenopodiaceae). *Plant systematics and evolution*  
590 **298**, 251-255 (2012).
- 591 9. Jarvis, D.E. *et al.* The genome of *Chenopodium quinoa*. *Nature* **542**, 307 (2017).
- 592 10. Maughan, P.J. *et al.* Mitochondrial and chloroplast genomes provide insights into the  
593 evolutionary origins of quinoa (*Chenopodium quinoa* Willd.). *Scientific Reports* **9**, 185  
594 (2019).
- 595 11. Gandarillas, H., Alandia, S., Cardozo, A. & Mujica, A. Qinoa y Kaniwa cultivos Andinos.  
596 *Instituto Interamericano de Ciencias Agrícolas, Bogotá, Colombia* (1979).
- 597 12. Silvestri, V. & Gil, F. Alogamia en quinoa. *Revista de la Facultad de Ciencias Agrarias*  
598 **32**(2000).
- 599 13. Christensen, S.A. *et al.* Assessment of genetic diversity in the USDA and CIP-FAO  
600 international nursery collections of quinoa (*Chenopodium quinoa* Willd.) using  
601 microsatellite markers. *Plant Genetic Resources: Characterisation and Utilisation* **5**, 82-95  
602 (2007).

- 603 14. Peterson, A., Jacobsen, S.E., Bonifacio, A. & Murphy, K. A crossing method for Quinoa.  
604 *Sustainability (Switzerland)* **7**, 3230-3243 (2015).
- 605 15. Emrani, N. *et al.* An efficient method to produce segregating populations in quinoa  
606 (*Chenopodium quinoa* Willd.). (2020).
- 607 16. Gandarillas, H. Botánica. in *Quinoa y kañiwa: cultivos Andinos* (ed. Tapia, M.E.) (CIID,  
608 Bogotá, 1979).
- 609 17. Bonifacio, A., Gomez-Pando, L. & Rojas, W. Quinoa breeding and modern variety  
610 development. *State of the Art Report on Quinoa Around the World* (2013).
- 611 18. Gomez-Pando, L. Quinoa breeding. *Quinoa: Improvement and Sustainable Production*, 87-  
612 108 (2015).
- 613 19. Murphy, K.M. *et al.* Quinoa breeding and genomics. *Plant Breeding Reviews* **42**, 257-320  
614 (2018).
- 615 20. Wilson, H.D. Allozyme variation and morphological relationships of *Chenopodium*  
616 *hircinum* (s.l.). *Syst. Bot* **13**(1988).
- 617 21. Ruas, P.M., Bonifacio, A., Ruas, C.F., Fairbanks, D.J. & Andersen, W.R. Genetic  
618 relationship among 19 accessions of six species of *Chenopodium* L., by Random Amplified  
619 Polymorphic DNA fragments (RAPD). *Euphytica* **105**, 25-32 (1999).
- 620 22. Rodríguez, L.A. & Isla, M.T. Comparative analysis of genetic and morphologic diversity  
621 among quinoa accessions (*Chenopodium quinoa* Willd.) of the South of Chile and highland  
622 accessions. *Journal of Plant Breeding and Crop Science* **1**, 210-216 (2009).
- 623 23. Mason, S. *et al.* Development and use of microsatellite markers for germplasm  
624 characterization in quinoa (*Chenopodium quinoa* Willd.). *Crop Science* **45**, 1618-1630  
625 (2005).
- 626 24. Coles, N. *et al.* Development and use of an expressed sequenced tag library in quinoa  
627 (*Chenopodium quinoa* Willd.) for the discovery of single nucleotide polymorphisms. *Plant*  
628 *Science* **168**, 439-447 (2005).
- 629 25. Maughan, P.J. *et al.* Single Nucleotide Polymorphism Identification, Characterization, and  
630 Linkage Mapping in Quinoa. *The Plant Genome Journal* **5**, 114 (2012).
- 631 26. Zhang, T. *et al.* Development of novel InDel markers and genetic diversity in *Chenopodium*  
632 *quinoa* through whole-genome re-sequencing. *BMC Genomics* **18**, 685 (2017).
- 633 27. Cingolani, P. *et al.* A program for annotating and predicting the effects of single nucleotide  
634 polymorphisms, SnpEff: SNPs in the genome of *Drosophila melanogaster* strain w<sup>1118</sup>; iso-  
635 2; iso-3. *Fly* **6**, 80-92 (2012).
- 636 28. Varshney, R.K. *et al.* Pearl millet genome sequence provides a resource to improve  
637 agronomic traits in arid environments. *Nature biotechnology* **35**, 969-976 (2017).

- 638 29. Varshney, R.K. *et al.* Resequencing of 429 chickpea accessions from 45 countries provides  
639 insights into genome diversity, domestication and agronomic traits. *Nature Genetics* **51**,  
640 857-864 (2019).
- 641 30. Hatlestad, G.J. *et al.* The beet *R* locus encodes a new cytochrome P450 required for red  
642 betalain production. *Nature Genetics* **44**, 816-820 (2012).
- 643 31. Bean, A. *et al.* Gain-of-function mutations in beet DODA 2 identify key residues for  
644 betalain pigment evolution. *New Phytologist* **219**, 287-296 (2018).
- 645 32. Solovieff, N., Cotsapas, C., Lee, P.H., Purcell, S.M. & Smoller, J.W. Pleiotropy in complex  
646 traits: challenges and strategies. *Nature Reviews Genetics* **14**, 483-495 (2013).
- 647 33. Devanathan, S., Erban, A., Perez-Torres Jr, R., Kopka, J. & Makaroff, C.A. *Arabidopsis*  
648 *thaliana* glyoxalase 2-1 is required during abiotic stress but is not essential under normal  
649 plant growth. *PLoS One* **9**, e95971 (2014).
- 650 34. Lu, X. *et al.* A *PP2C-1* allele underlying a quantitative trait locus enhances soybean 100-  
651 seed weight. *Molecular Plant* **10**, 670-684 (2017).
- 652 35. Li, N., Xu, R. & Li, Y. Molecular networks of seed size control in plants. *Annual review of*  
653 *plant biology* **70**, 435-463 (2019).
- 654 36. Zhang, R. *et al.* Evolution of disease defense genes and their regulators in plants.  
655 *International Journal of Molecular Sciences* **20**, 335 (2019).
- 656 37. Rojas, W. *et al.* Quinoa genetic resources and ex situ conservation. (2015).
- 657 38. Milner, S.G. *et al.* Genebank genomics highlights the diversity of a global barley collection.  
658 *Nature Genetics* **51**, 319-326 (2019).
- 659 39. Wu, D. *et al.* Whole-genome resequencing of a worldwide collection of rapeseed accessions  
660 reveals the genetic basis of ecotype divergence. *Molecular plant* **12**, 30-43 (2019).
- 661 40. Jia, G. *et al.* A haplotype map of genomic variations and genome-wide association studies of  
662 agronomic traits in foxtail millet (*Setaria italica*). *Nature genetics* **45**, 957-961 (2013).
- 663 41. Varshney, R.K. *et al.* Whole-genome resequencing of 292 pigeonpea accessions identifies  
664 genomic regions associated with domestication and agronomic traits. *Nature Genetics* **49**,  
665 1082 (2017).
- 666 42. Zhou, Z. *et al.* Resequencing 302 wild and cultivated accessions identifies genes related to  
667 domestication and improvement in soybean. *Nature biotechnology* **33**, 408-414 (2015).
- 668 43. Mather, K.A. *et al.* The extent of linkage disequilibrium in rice (*Oryza sativa* L.). *Genetics*  
669 **177**, 2223-2232 (2007).
- 670 44. Xu, X. *et al.* Resequencing 50 accessions of cultivated and wild rice yields markers for  
671 identifying agronomically important genes. *Nature biotechnology* **30**, 105-111 (2012).
- 672 45. Huang, X. *et al.* Genome-wide association studies of 14 agronomic traits in rice landraces.  
673 *Nature genetics* **42**, 961 (2010).

- 674 46. Zhao, G. *et al.* A comprehensive genome variation map of melon identifies multiple  
675 domestication events and loci influencing agronomic traits. *Nature Genetics* **51**, 1607-1615  
676 (2019).
- 677 47. Choi, Y.-J. *et al.* Morphological and molecular characterization of the causal agent of  
678 downy mildew on quinoa (*Chenopodium quinoa*). *Mycopathologia* **169**, 403-412 (2010).
- 679 48. Colque-Little, C.X. *et al.* Genetic variation for tolerance to the downy mildew pathogen  
680 *Peronospora variabilis* in genetic resources of quinoa (*Chenopodium quinoa*). *bioRxiv*  
681 (2020).
- 682 49. Chakravarty, T. & Sopory, S. Blue light stimulation of cell proliferation and glyoxalase I  
683 activity in callus cultures of *Amaranthus paniculatus*. *Plant science* **132**, 63-69 (1998).
- 684 50. Bates, D., Mächler, M., Bolker, B. & Walker, S. Fitting Linear Mixed-Effects Models Using  
685 lme4. *J Stat Soft* **67**, 48 (2015).
- 686 51. Lê, S., Josse, J. & Husson, F. FactoMineR: an R package for multivariate analysis. *Journal*  
687 *of statistical software* **25**, 1-18 (2008).
- 688 52. Bolger, A.M., Lohse, M. & Usadel, B. Trimmomatic: a flexible trimmer for Illumina  
689 sequence data. *Bioinformatics* **30**, 2114-2120 (2014).
- 690 53. Li, H. & Durbin, R. Fast and accurate long-read alignment with Burrows–Wheeler  
691 transform. *Bioinformatics* **26**, 589-595 (2010).
- 692 54. Li, H. *et al.* The sequence alignment/map format and SAMtools. *Bioinformatics* **25**, 2078-  
693 2079 (2009).
- 694 55. McKenna, A. *et al.* The Genome Analysis Toolkit: a MapReduce framework for analyzing  
695 next-generation DNA sequencing data. *Genome research* **20**, 1297-1303 (2010).
- 696 56. Van der Auwera, G.A. *et al.* From FastQ data to high-confidence variant calls: the genome  
697 analysis toolkit best practices pipeline. *Current protocols in bioinformatics* **43**, 11.10. 1-  
698 11.10. 33 (2013).
- 699 57. Li, H. Tabix: fast retrieval of sequence features from generic TAB-delimited files.  
700 *Bioinformatics* **27**, 718-719 (2011).
- 701 58. Danecek, P. *et al.* The variant call format and VCFtools. *Bioinformatics* **27**, 2156-2158  
702 (2011).
- 703 59. Kalyanamoorthy, S., Minh, B.Q., Wong, T.K., von Haeseler, A. & Jermini, L.S.  
704 ModelFinder: fast model selection for accurate phylogenetic estimates. *Nature methods* **14**,  
705 587 (2017).
- 706 60. Hoang, D.T., Chernomor, O., Von Haeseler, A., Minh, B.Q. & Vinh, L.S. UFBoot2:  
707 improving the ultrafast bootstrap approximation. *Molecular Biology and Evolution* **35**, 518-  
708 522 (2017).
- 709 61. Letunic, I. & Bork, P. Interactive tree of life (iTOL) v3: an online tool for the display and  
710 annotation of phylogenetic and other trees. *Nucleic Acids Research* **44**, W242-W245 (2016).

- 711 62. Ruden, D.M. *et al.* Using *Drosophila melanogaster* as a model for genotoxic chemical  
712 mutational studies with a new program, SnpSift. *Frontiers in genetics* **3**, 35 (2012).
- 713 63. Wang, W. *et al.* Genomic variation in 3,010 diverse accessions of Asian cultivated rice.  
714 *Nature* **557**, 43-49 (2018).
- 715 64. Alexander, D.H., Novembre, J. & Lange, K. Fast model-based estimation of ancestry in  
716 unrelated individuals. *Genome research* **19**, 1655-1664 (2009).
- 717 65. Jakobsson, M. & Rosenberg, N.A. CLUMPP: a cluster matching and permutation program  
718 for dealing with label switching and multimodality in analysis of population structure.  
719 *Bioinformatics* **23**, 1801-1806 (2007).
- 720 66. Zheng, X. *et al.* A high-performance computing toolset for relatedness and principal  
721 component analysis of SNP data. *Bioinformatics* **28**, 3326-3328 (2012).
- 722 67. Zhang, C., Dong, S.-S., Xu, J.-Y., He, W.-M. & Yang, T.-L. PopLDdecay: a fast and  
723 effective tool for linkage disequilibrium decay analysis based on variant call format files.  
724 *Bioinformatics* **35**, 1786-1788 (2018).
- 725 68. Kang, H.M. *et al.* Variance component model to account for sample structure in genome-  
726 wide association studies. *Nature Genetics* **42**, 348-354 (2010).
- 727 69. Li, M.-X., Yeung, J.M., Cherny, S.S. & Sham, P.C. Evaluating the effective numbers of  
728 independent tests and significant p-value thresholds in commercial genotyping arrays and  
729 public imputation reference datasets. *Human genetics* **131**, 747-756 (2012).
- 730 70. Turner, S.D. qqman: an R package for visualizing GWAS results using QQ and manhattan  
731 plots. *Biorxiv*, 005165 (2014).

732

733 **Supplementary data**

734 **Supplementary tables**

735 **Supplementary Table 1:** Accessions from the quinoa diversity panel and results from re-  
736 sequencing

737 **Supplementary Table 2:** Summary of high-quality SNPs identified in quinoa accessions

738 **Supplementary Table 3:** Variance components analysis of 12 quantitative traits

739 **Supplementary Table 4:** Summary of marker trait associations (MTA)

740 **Supplementary Table 5:** Candidate genes linked to SNP with significant trait associations

741 **Supplementary Table 6:** Summary of MTA associated with DTF, DTM, PD and PH identified on  
742 chromosome Cq2A

743 **Supplementary Table 7:** Candidate genes located within the 50kb flanking regions of significantly  
744 associated SNPs from the multivariate GWAS analysis

## 745 **Supplementary figures**

746 **Supplementary Fig. 1:** Geographical origin of the accessions forming the quinoa diversity panel.

747 **Supplementary Fig. 2:** Overview of the field experiment and exemplary images demonstrating  
748 phenotypic traits; (A) and (B): Overview of the field and phenotypic variation among accession;  
749 (C): Bolting (BBCH51) and (D) flowering (BBCH60) stage; Glomerulate (E) and amarantiform (F)  
750 panicle shapes; red (G) and green (H) stem color ; red (I) and green (J) flower/inflorescence;  
751 Growth type 1 (K) and type 5 (L); (M): Plant height and maturity variation between two accessions.

752 **Supplementary Fig. 3:** SNP density heat map across the 18 quinoa chromosomes. Different colors  
753 depict SNP density.

754 **Supplementary Fig. 4:** Chromosome wide LD decay in genome A (A) and genome B (B). Colors  
755 are depicting different chromosomes. (C) Genome-wide average LD decay of the A sub-genome  
756 (blue) and B sub-genome (red).

757 **Supplementary Fig. 5:** SNP based PCA across all 18 quinoa chromosomes. Red circles are  
758 depicting the two clusters of Lowland accessions.

759 **Supplementary Fig. 6** (A) ADMIXTURE ancestry coefficients for K ranging from 3 to 7 and 9.  
760 Each vertical bar represents an accession, and color proportions on the bar correspond to the genetic  
761 ancestry. (B) Cross-validation error in ADMIXTURE run.

762 **Supplementary Fig. 7:** Diversity of populations along chromosomes measured based on 10 kb non-  
763 overlapping windows. Nucleotide diversity ( $\pi$ ) distribution of 10 kb windows in population  
764 Highland (A) and Lowland (B). (C) Nucleotide diversity ratios ( $\pi$  Lowland/  $\pi$  Highland). (D)  
765 Pairwise genome-wide fixation index ( $F_{ST}$ ) between Highland and Lowland. The broken horizontal  
766 line represents the top 1% threshold.

767 **Supplementary Fig. 8:** Distribution of Tajima's  $D$  along chromosomes in Highland (B) and  
768 Lowland (D) populations. Density distribution of Tajima's  $D$  between populations. Different colors  
769 represent the quartiles.

770 **Supplementary Fig. 9:** Graphical presentation of correlations between years among 12 traits.  
771 Pearson correlation value ( $R$ ) with  $P$ -values are shown. DTB: days to bolting (inflorescence  
772 emergence), DTF: days to flowering, DTB to DTF: days between bolting and flowering, DTM;  
773 days to maturity, PH: plant height (cm), PL: panicle length (cm), PD: panicle density (cm), NoB:  
774 Number of branches, STL: stem lying, Saponin: saponin content as foam height (mm), Seed yield:  
775 seed yield per plant (g), TSW: thousand seed weight (g),

776 **Supplementary Fig. 10:** Pearson correlations among 12 quinoa traits. Best linear unbiased  
777 estimates across two years were used. Below the diagonal, scatter plots are shown with the fitted  
778 line in red. Above the diagonal, the Pearson correlation coefficients are shown with significance  
779 levels, \*\*\* =  $P < 0.001$ , \*\* =  $P < 0.01$ .

780 **Supplementary Fig. 11:** PCA of 12 quantitative phenotypes. A: Individual factor map colored  
781 according to populations identified from SNP analysis. B: Variables factor map of the PCA.

782 **Supplementary Fig. 12:** Manhattan plots from GWAS with data from 2018 (left), 2019 (center),  
783 and the mean of both years (right): The blue horizontal line indicates the suggestive threshold -

784  $\log_{10}(8.98E-7)$ . The red horizontal line indicates the significant threshold (Bonferroni correction) -  
785  $\log_{10}(1.67e-8)$ .

786 **Supplementary Fig. 13:** Quantile-quantile plots of GWAS in two years, 2018 (left) and 2019  
787 (center), and BLUE (right).

788 **Supplementary Fig. 14:** Local Manhattan plots for (A) flower color, (B) saponin content, and (C)  
789 mildew infection. Candidate genes are shown in the color legend. LD heat maps are placed at the  
790 Bottom. The colors of the heat map represent the pairwise correlation between individual SNPs.

791 **Supplementary Fig. 15:** PCA of 4 quantitative traits (DTF, DTM, PH, and PL). A: Individual  
792 factor map, B: variables factor map of the PCA, C: distribution of the first three principal  
793 components which were used for GWAS analysis.

794 **Supplementary Fig. 16:** GWAS analysis of principal components, PC1 (A), PC2 (B), PC3 (C):  
795 Manhattan plots (left), and quantile-quantile plots (right): The blue horizontal line in the Manhattan  
796 plots indicates the suggestive threshold  $-\log_{10}(8.98E-7)$ . The red horizontal line indicates the  
797 significance threshold (Bonferroni correction)  $-\log_{10}(1.67e-8)$ .

798 **Supplementary Fig. 17:** Haplotypes of two genes, *CqPP2C* and *CqRING* controlling seed size in  
799 quinoa. Geographic origin of the accessions and haplotype networks are displayed below the gene  
800 structure.



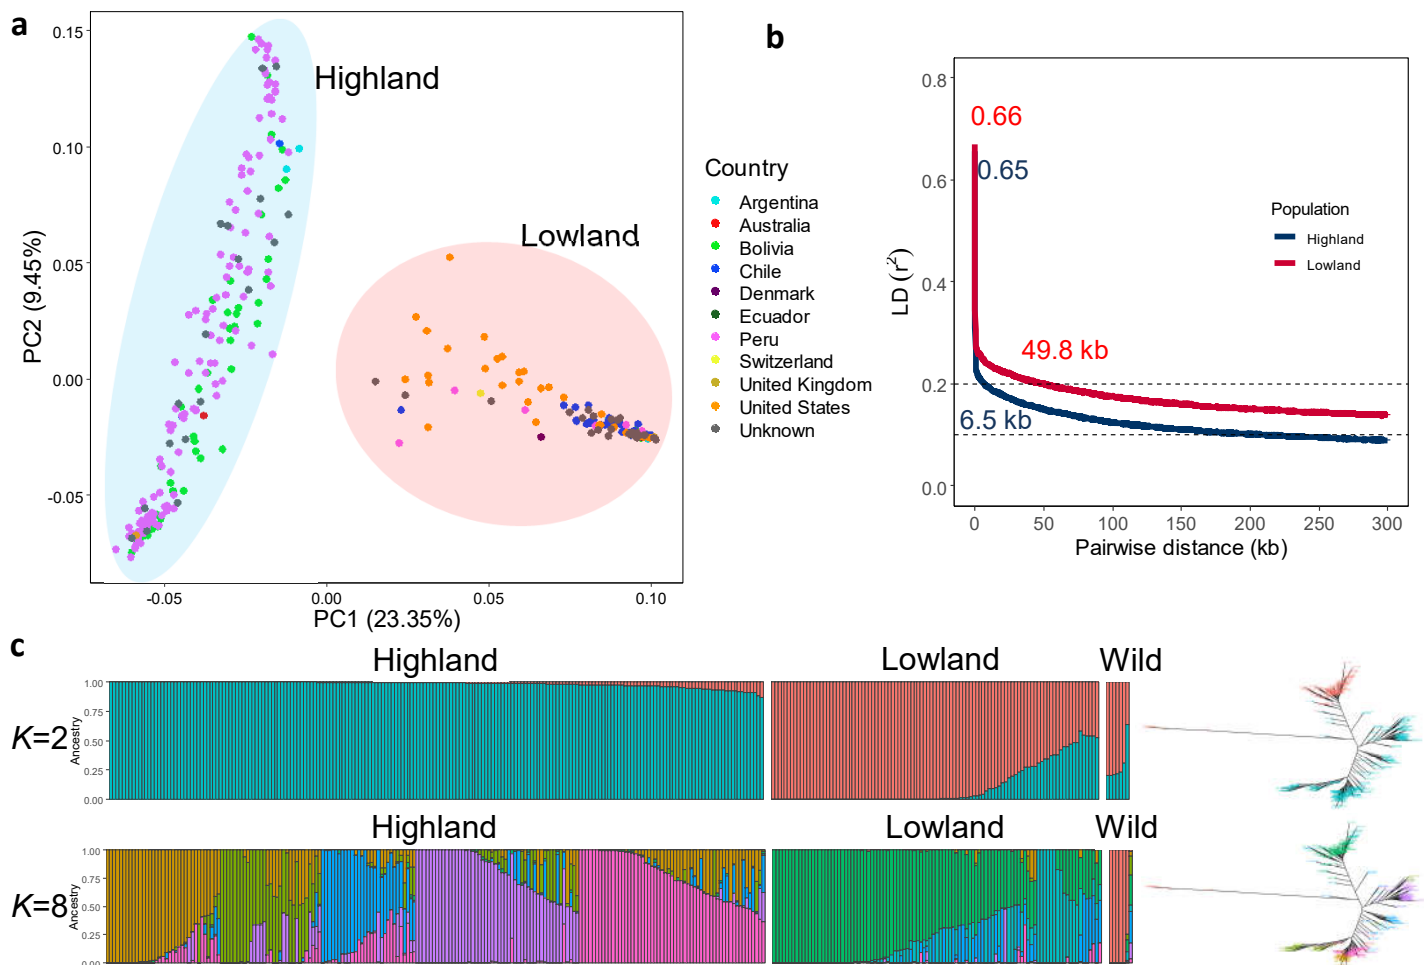

**Fig. 1:** Genetic diversity and population structure of the quinoa diversity panel. (a) PCA of 303 quinoa accessions. PC1 and PC2 represent the first two components of analysis, accounting for 23.35% and 9.45% of the total variation, respectively. The colors of dots represent the origin of accessions. Two populations are highlighted by different colors: Highland (light blue) and Lowland (pink). (b) Subpopulation wise LD decay in Highland (blue) and Lowland population (red). (c) Population structure is based on ten subsets of SNPs, each containing 50,000 SNPs from the whole-genome SNP data. Model-based clustering was done in ADMIXTURE with different numbers of ancestral kinships ( $K=2$  and  $K=8$ ).  $K=8$  was identified as the optimum number of populations. Left: Each vertical bar represents an accession, and color proportions on the bar correspond to the genetic ancestry. Right: Unrooted phylogenetic tree of the diversity panel. Colors correspond to the subpopulation.

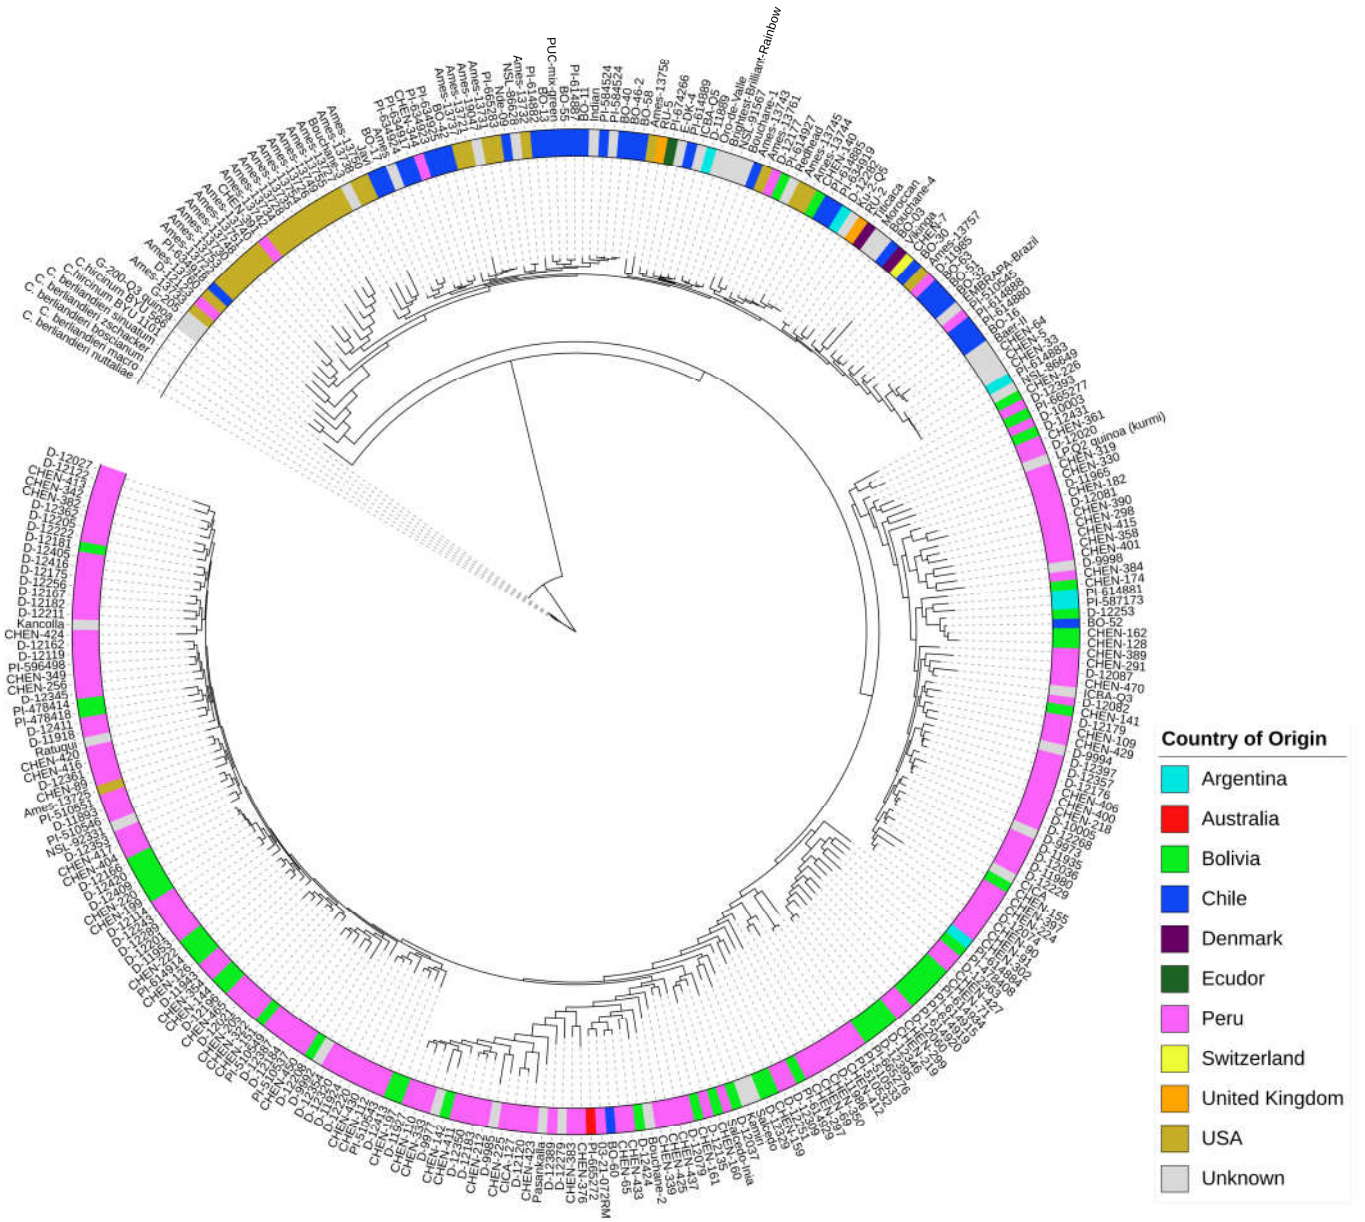

**Fig. 2:** Maximum likelihood tree of 303 quinoa and seven wild *Chenopodium* accessions from the diversity panel. Colors are depicting the geographical origin of accessions.

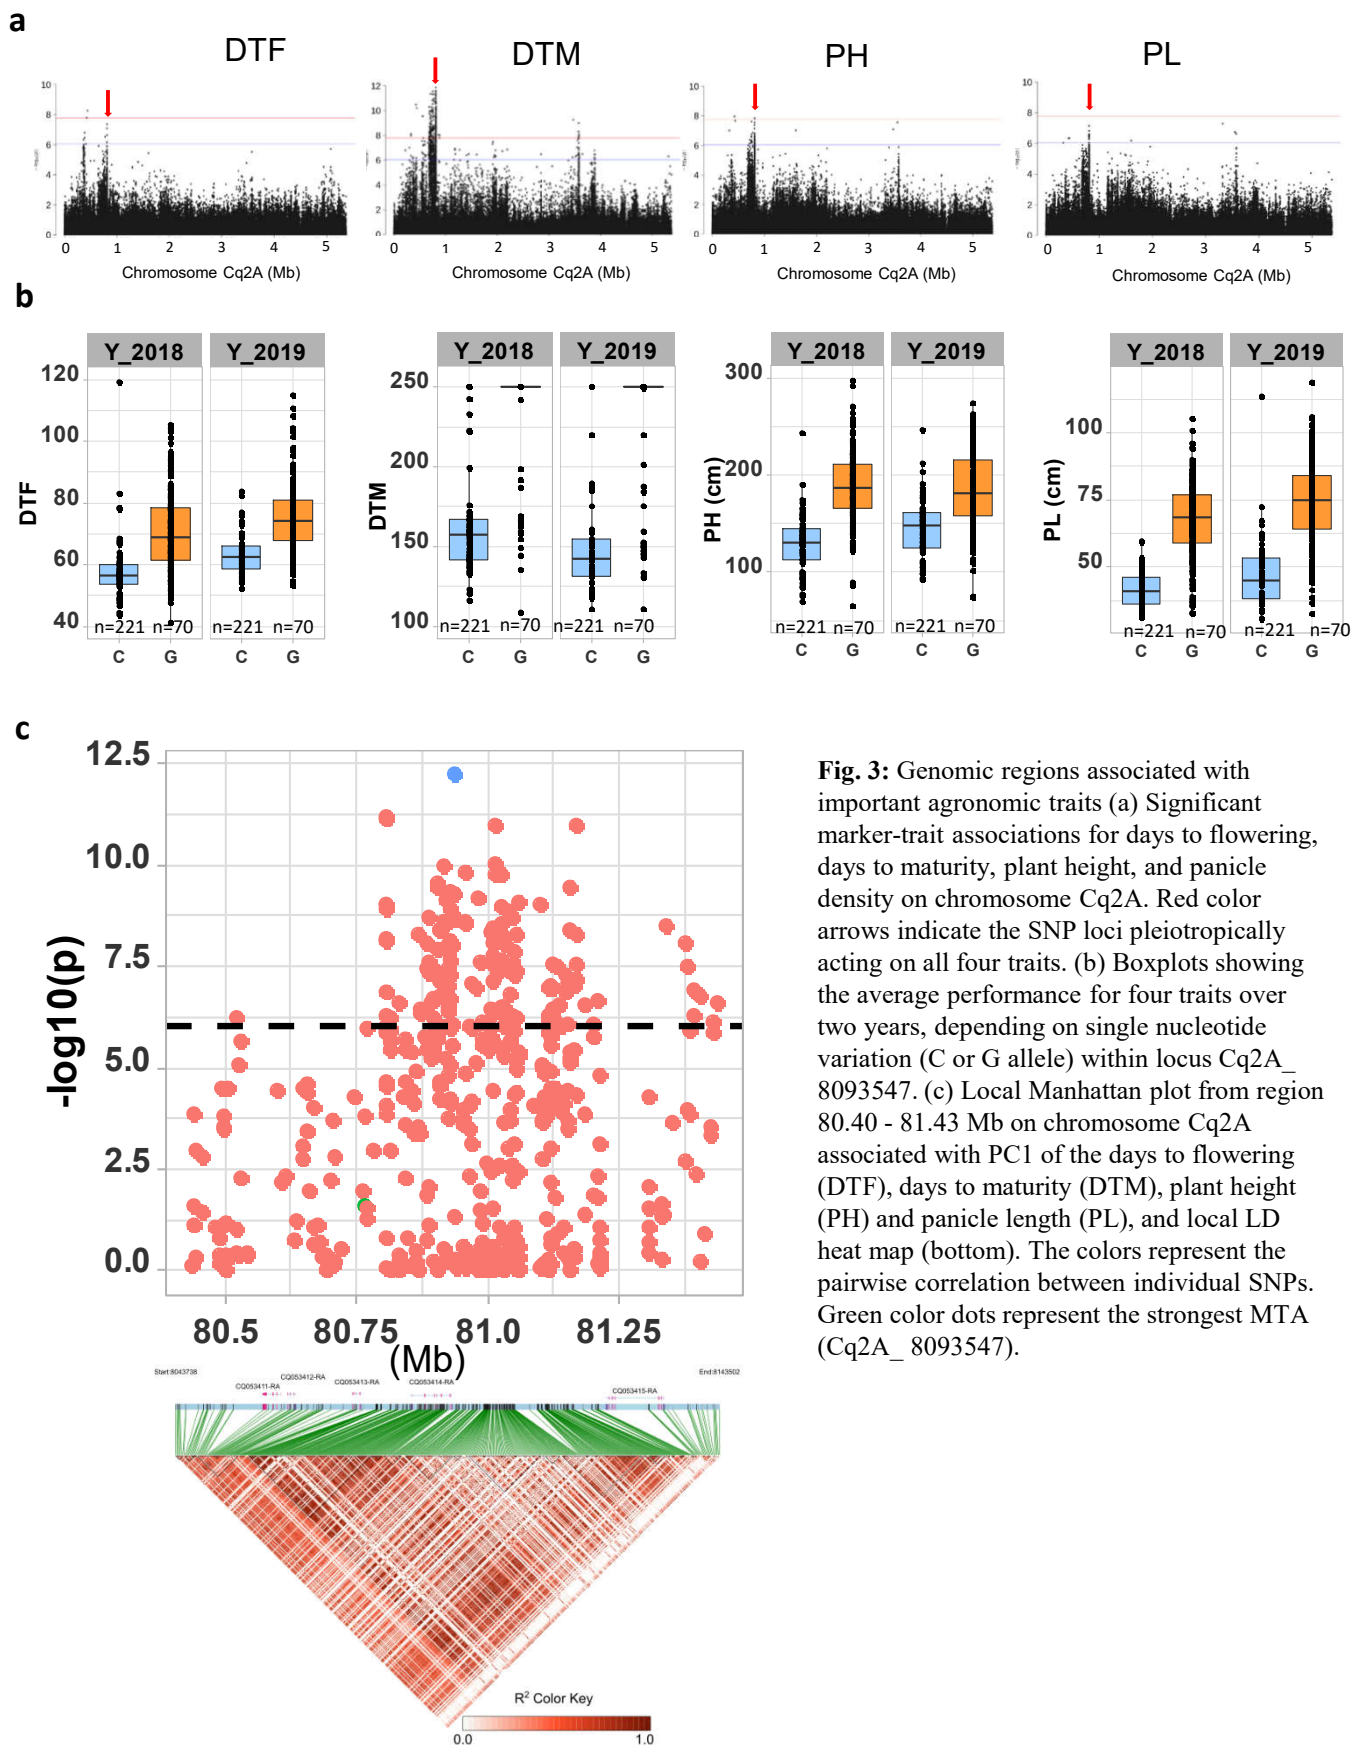

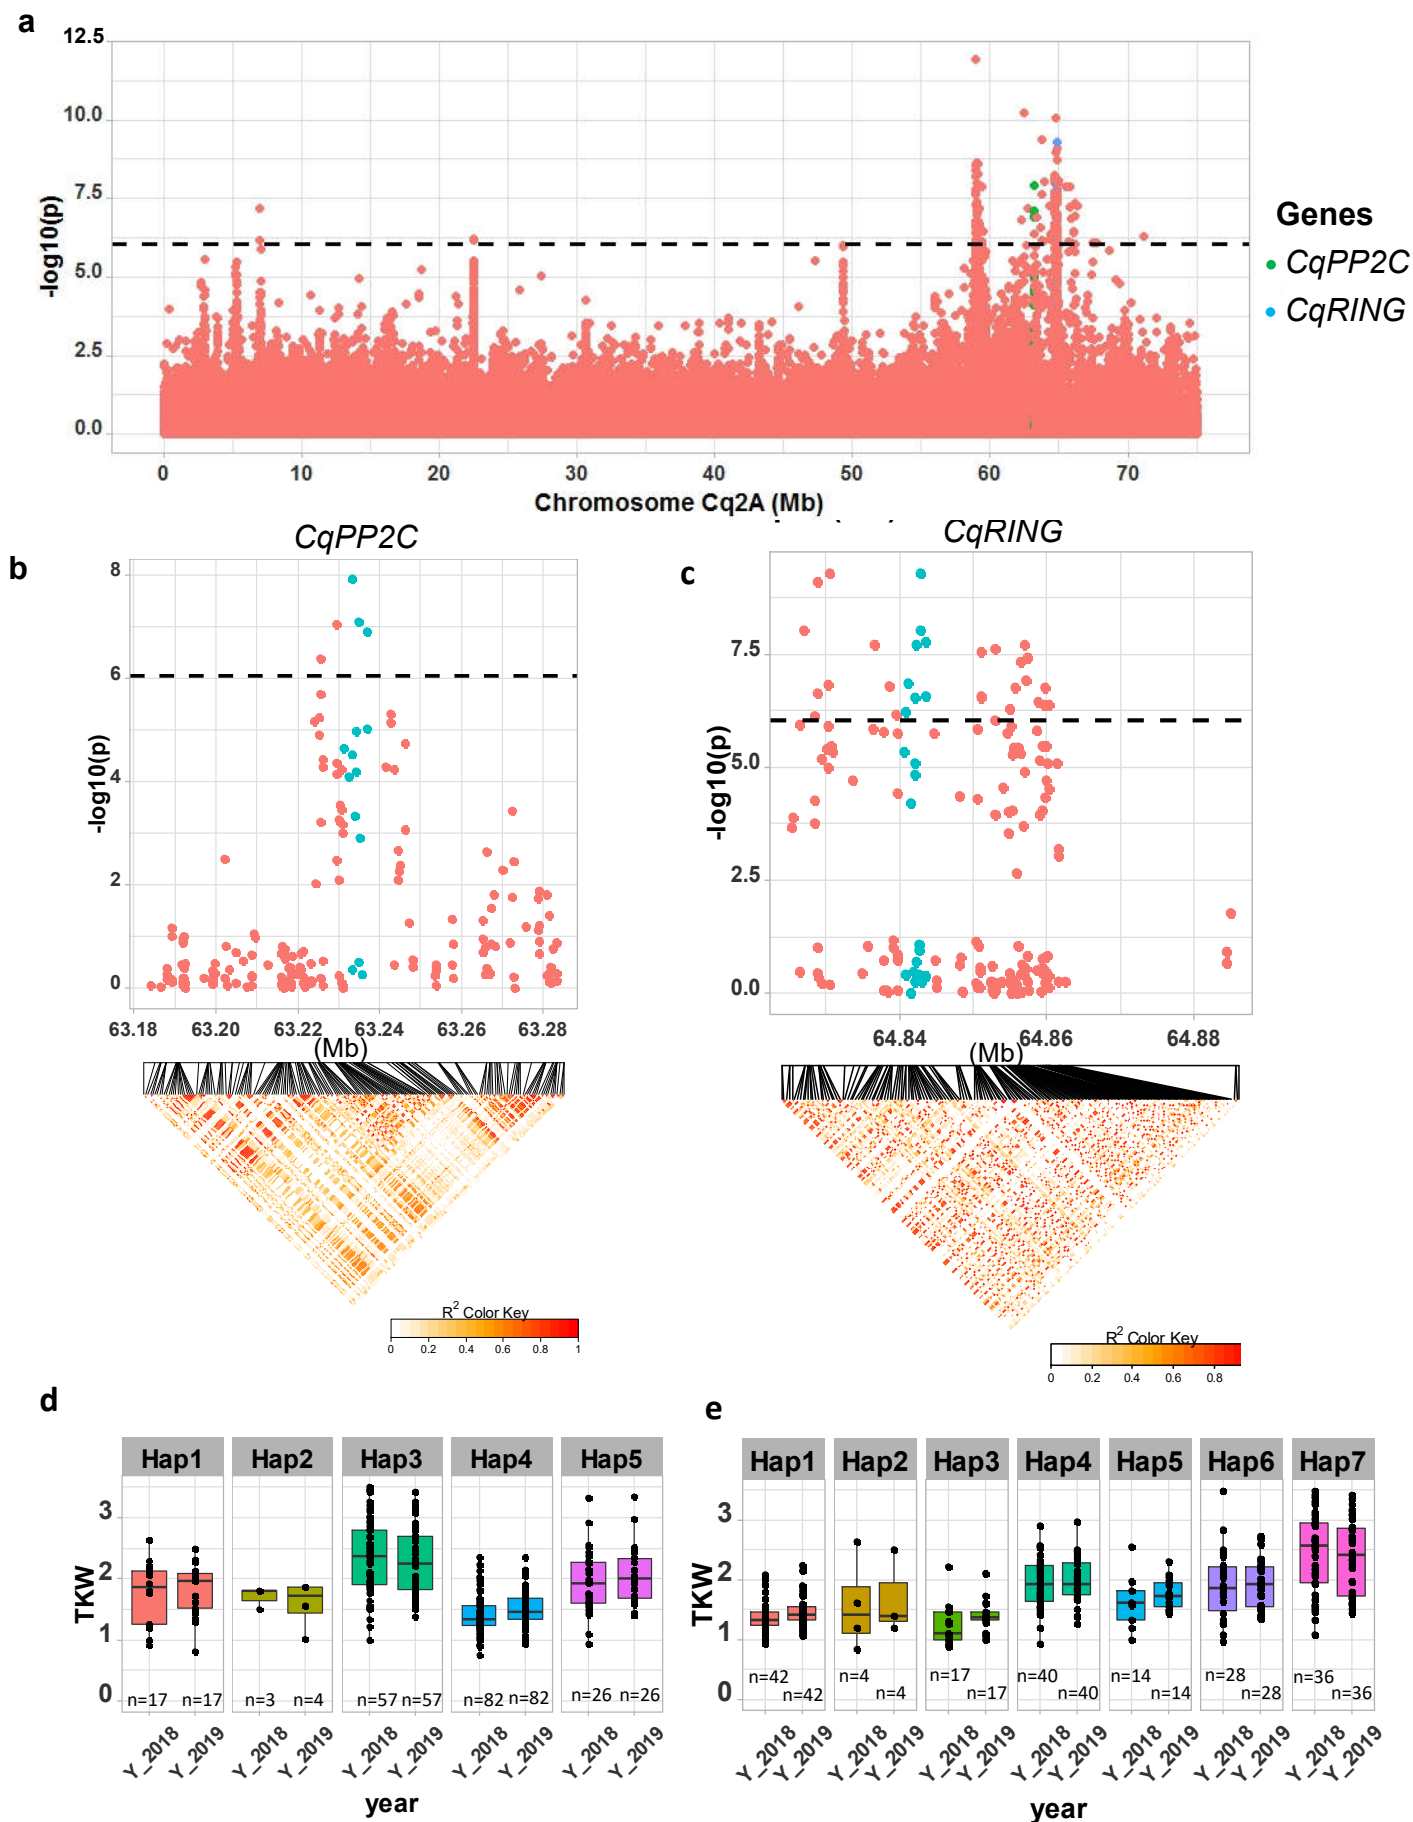

**Fig. 4:** Identification of candidate genes for thousand seed weight. (a) Manhattan plot from chromosome Cq8B. Green and blue dots are depicting the *CqPP2C5* and the *CqRING* gene, respectively. (b) Top: Local Manhattan plot in the neighborhood of the *CqPP2C* gene. Bottom: LD heat map. (c) Top: Local Manhattan plot in the neighborhood of the *CqRING* gene. Bottom: LD heat map. Differences in thousand seed weight between five *CqPP2C* (d) and seven *CqRING* haplotypes (e).
